# Supplementary material for: The link between relative stability constant of DNA- and BSA-chromenopyrimidine complexes and cytotoxicity towards human breast cancer cells (MCF-7)
Source: Royal Society of Chemistry journal article supplement (doi:10.1039/d3ra01741a), 2023-01-01
Supplement: d3ra01741a1.pdf [file d3ra01741a1.pdf]

**The link between relative stability constant of DNA- and BSA-  
chromenopyrimidine complexes and cytotoxicity towards human breast  
cancer cells (MCF-7)**

Sizwe J. Zamisa<sup>†</sup>, Adesola A. Adeleke<sup>‡</sup>, Nikita Devnarain<sup>¶</sup>, Mahasin Abdel Rhman<sup>¶</sup>, Peter M.  
O. Owira<sup>¶</sup> and Bernard Omondi<sup>†</sup>

*<sup>†</sup>School of Chemistry and Physics, University of KwaZulu-Natal, Private Bag X54001,  
Durban, 4000, South Africa*

*<sup>‡</sup>School of Chemistry and Physics, University of KwaZulu-Natal, Private Bag X01,  
Pietermaritzburg, South Africa*

*<sup>¶</sup>Molecular and Clinical Pharmacology Research Laboratory, Department of Pharmacology,  
Discipline of Pharmaceutical Science, University of KwaZulu-Natal, Private Bag X54001,  
Durban, 4000, South Africa*

---

**SUPPLEMENTARY INFORMATION**

---

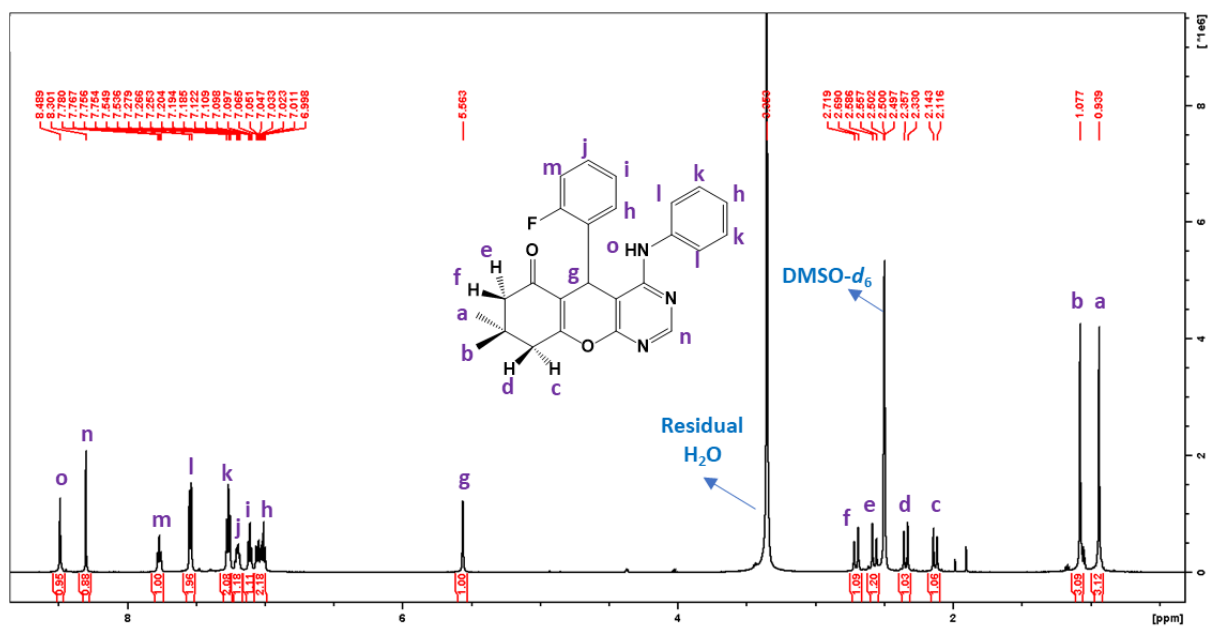

(a)

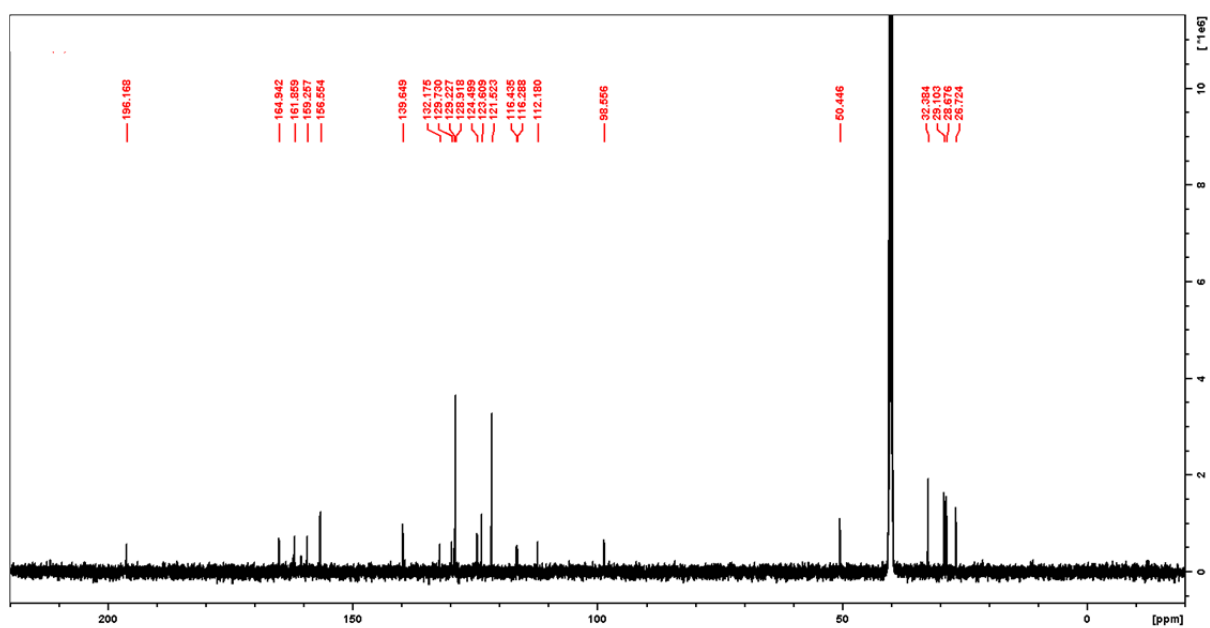

(b)

Figure S1: (a)  $^1\text{H}$  NMR and (b)  $^{13}\text{C}$  NMR spectra of 3a

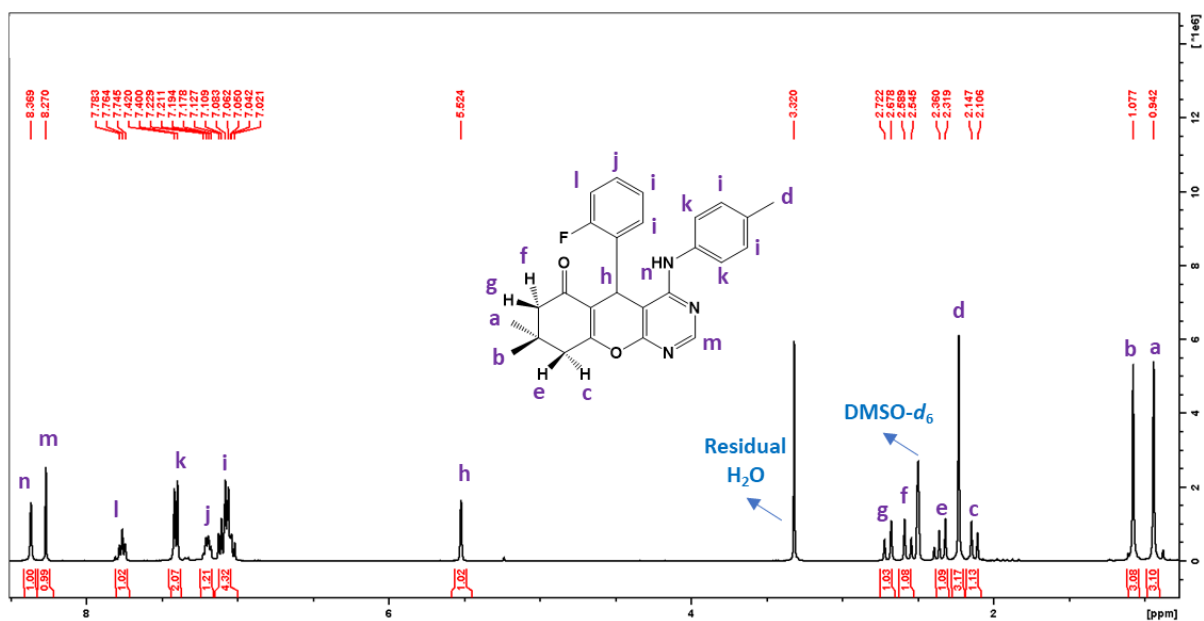

(a)

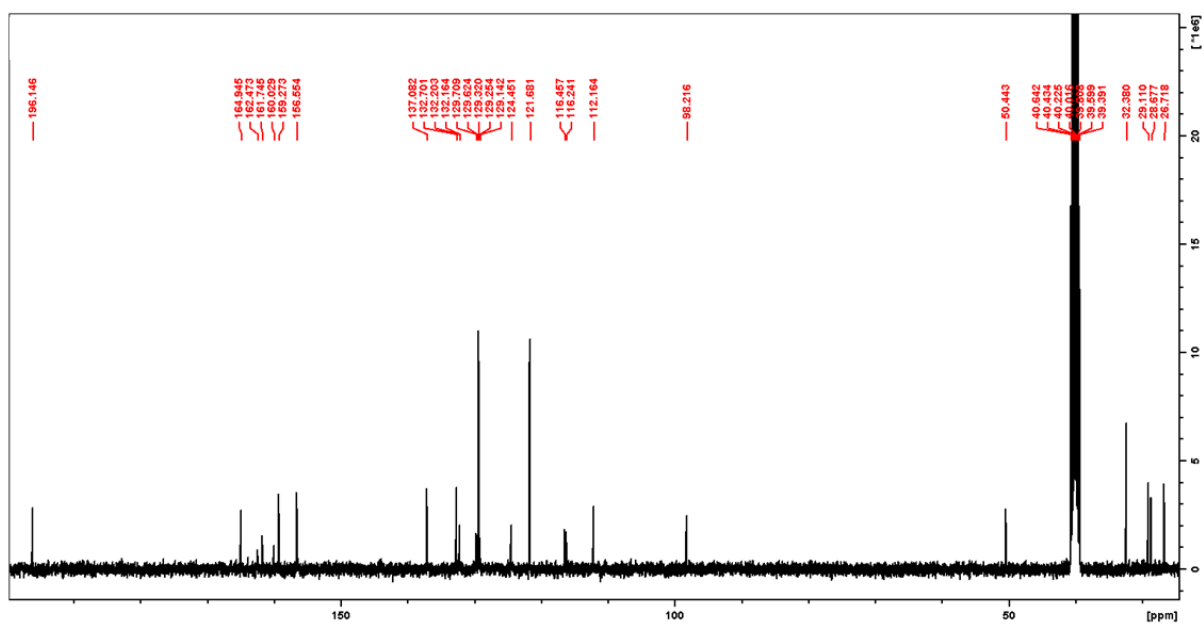

(b)

Figure S2: (a)  $^1\text{H}$  NMR and (b)  $^{13}\text{C}$  NMR spectra of **3b**

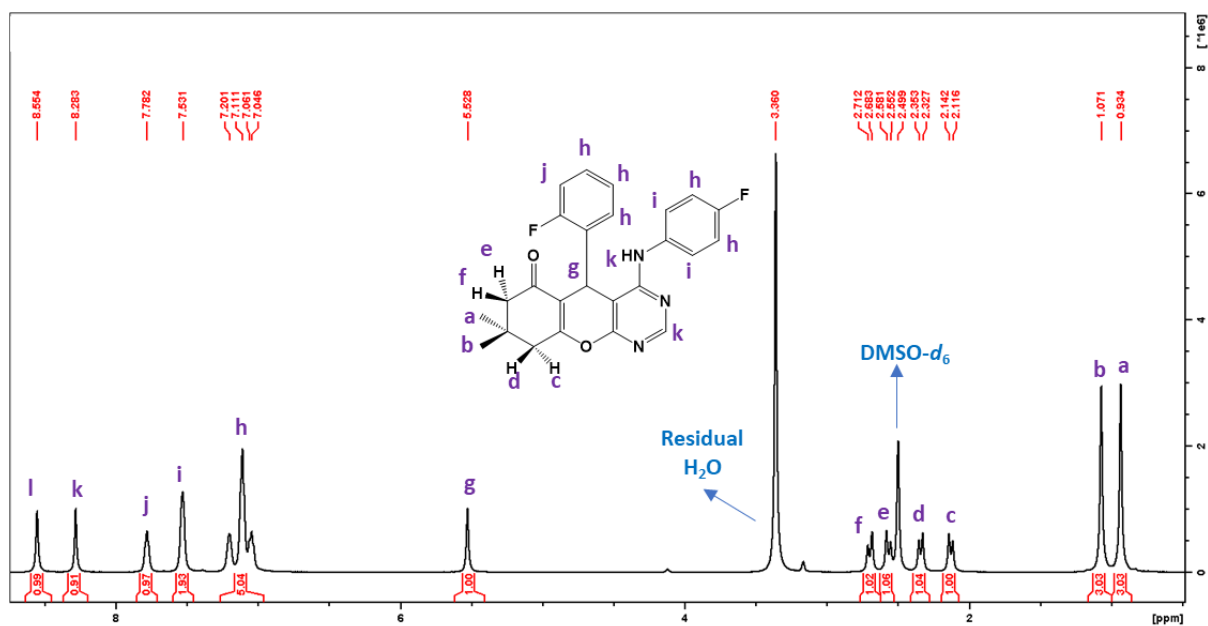

(a)

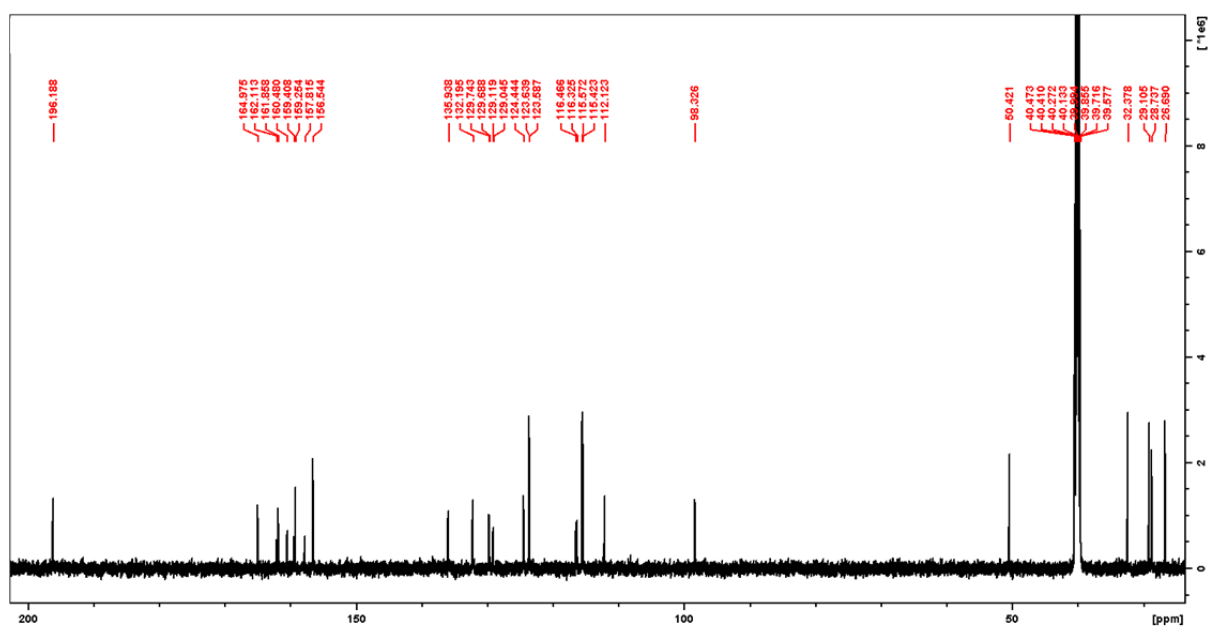

(b)

Figure S3: (a)  $^1\text{H}$  NMR and (b)  $^{13}\text{C}$  NMR spectra of **3c**

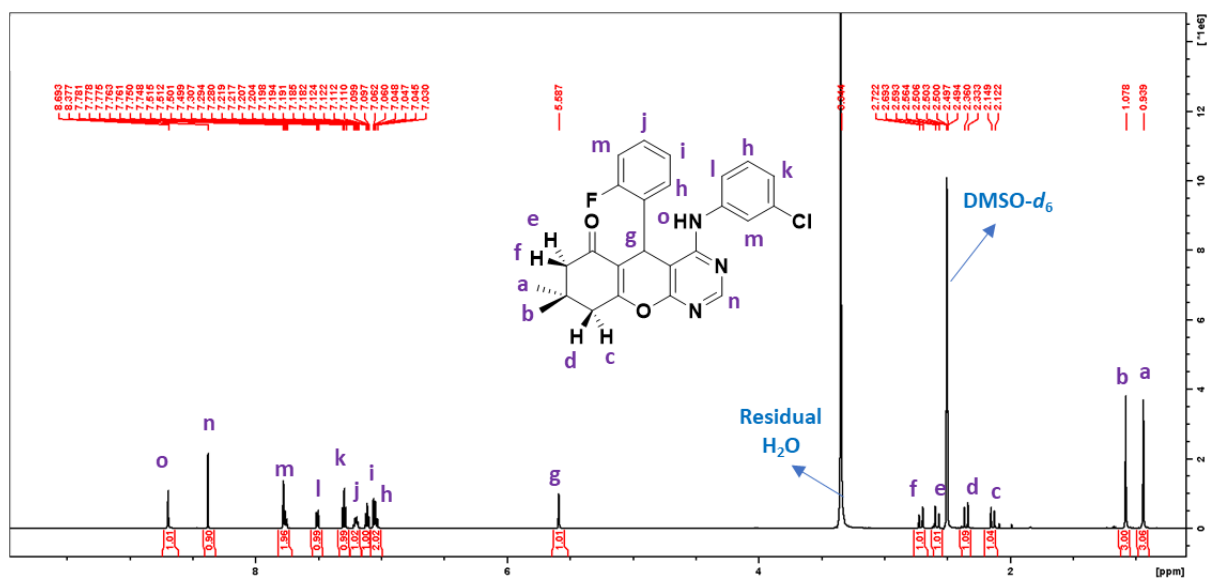

(a)

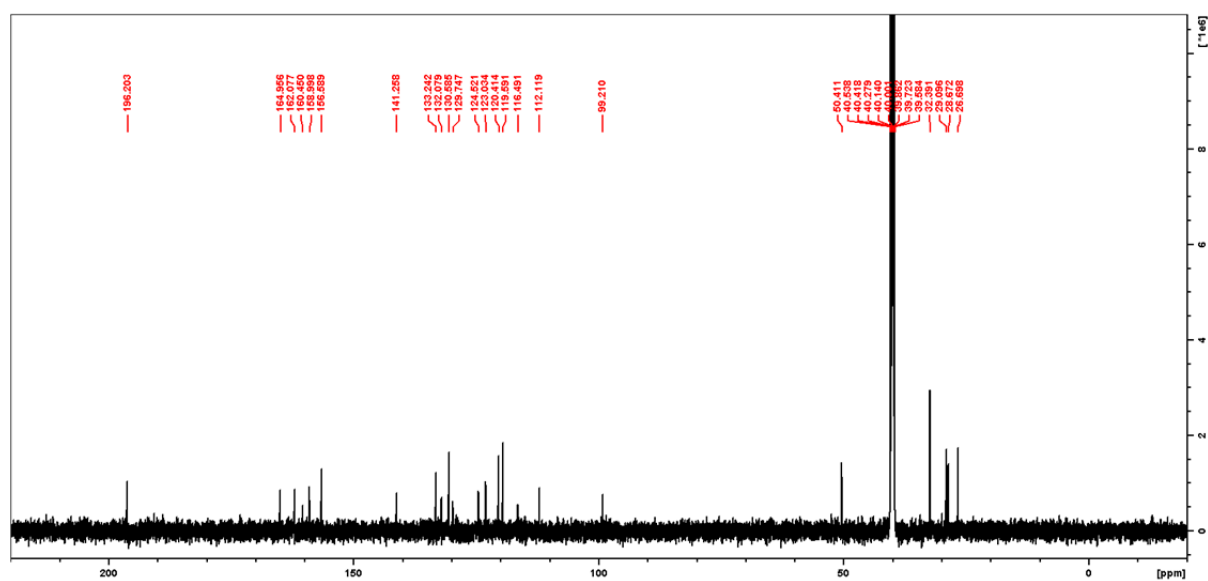

(b)

Figure S4: (a)  $^1\text{H}$  NMR and (b)  $^{13}\text{C}$  NMR spectra of 3d

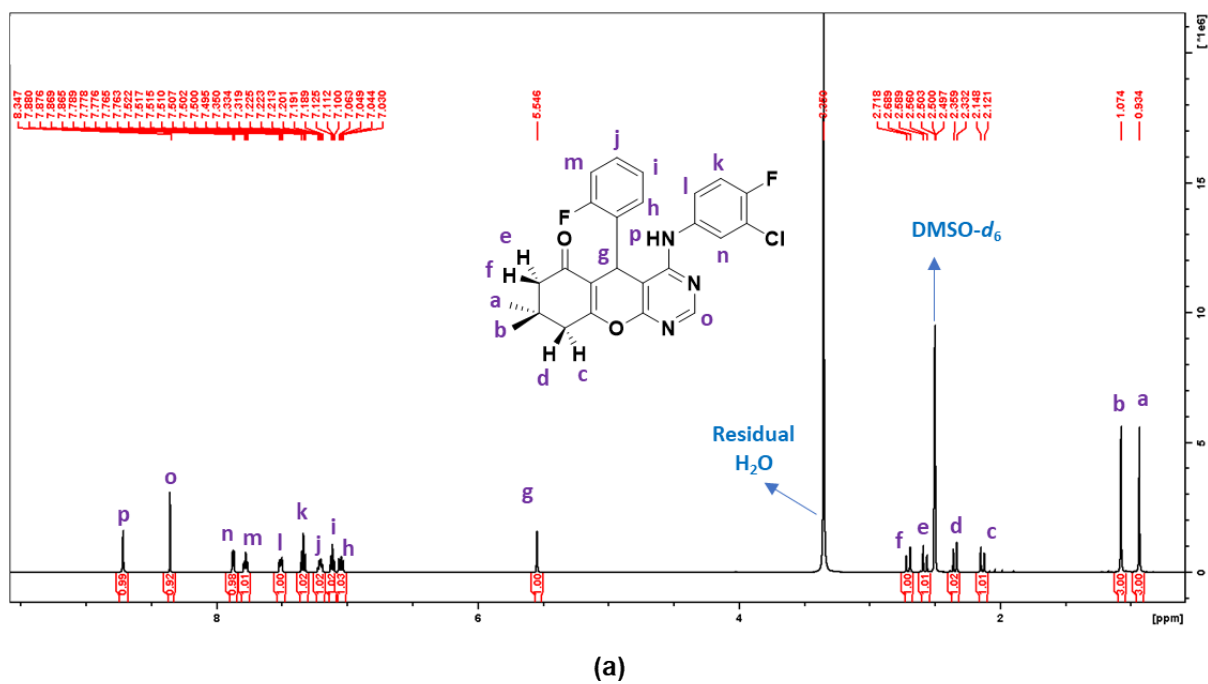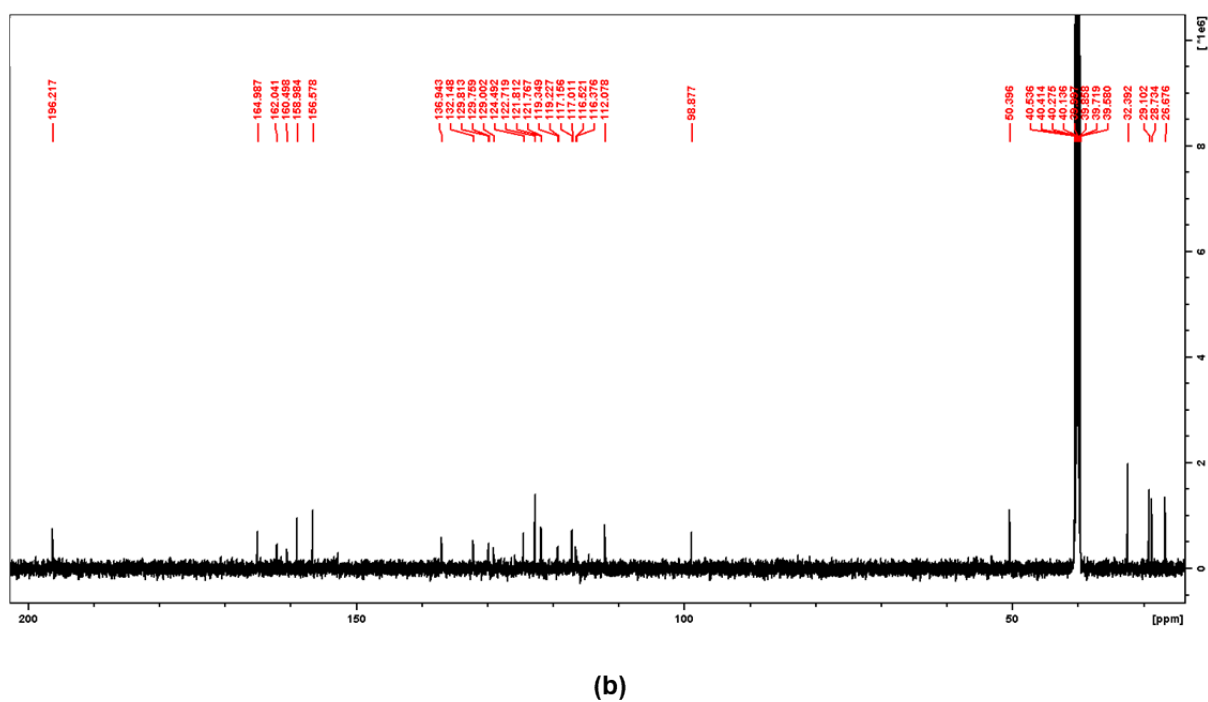

Figure S5: (a)  $^1\text{H}$  NMR and (b)  $^{13}\text{C}$  NMR spectra of **3e**

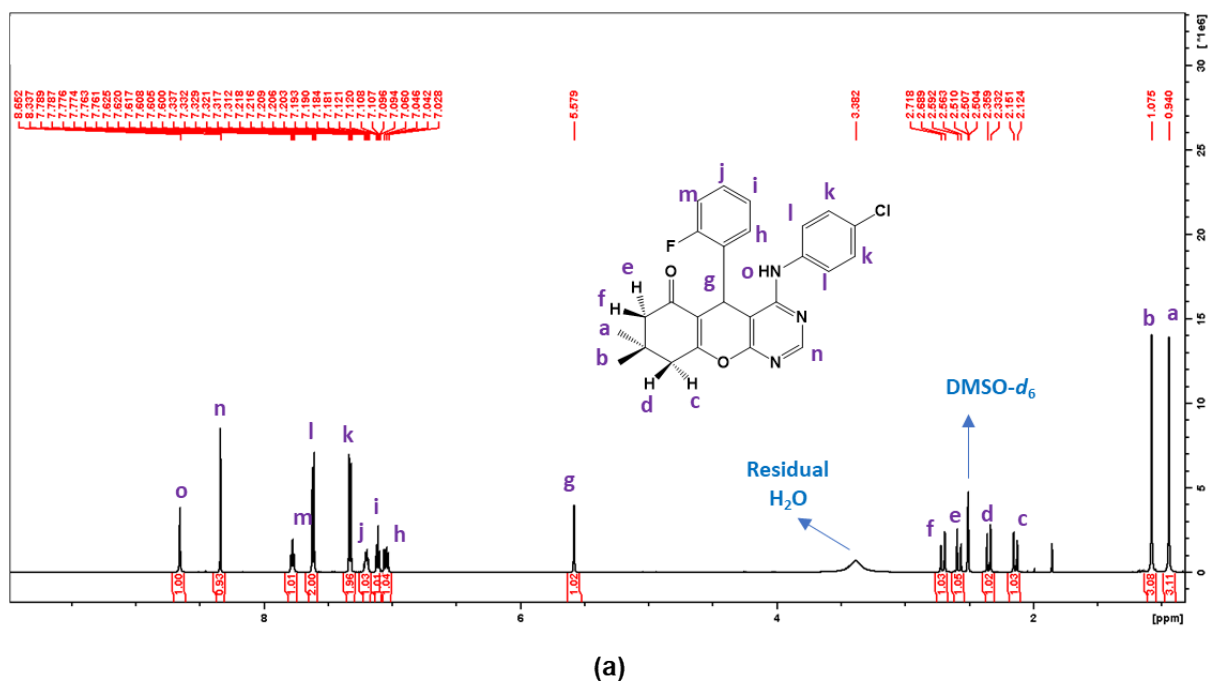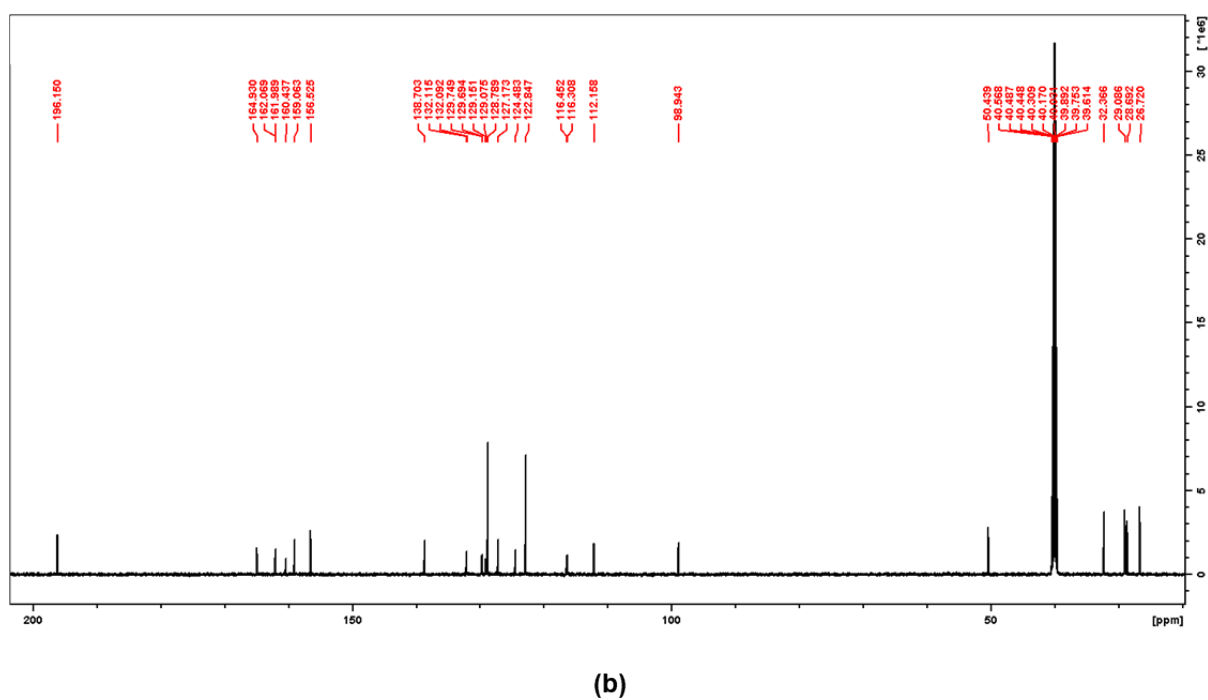

**Figure S6:** (a)  $^1\text{H}$  NMR and (b)  $^{13}\text{C}$  NMR spectra of **3f**

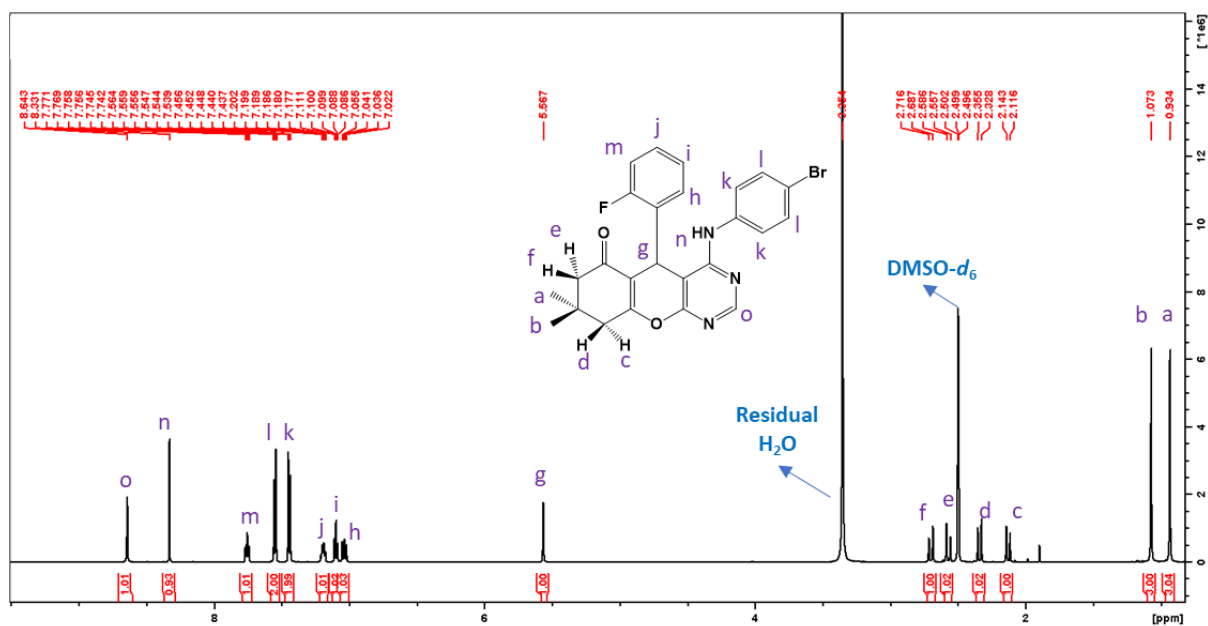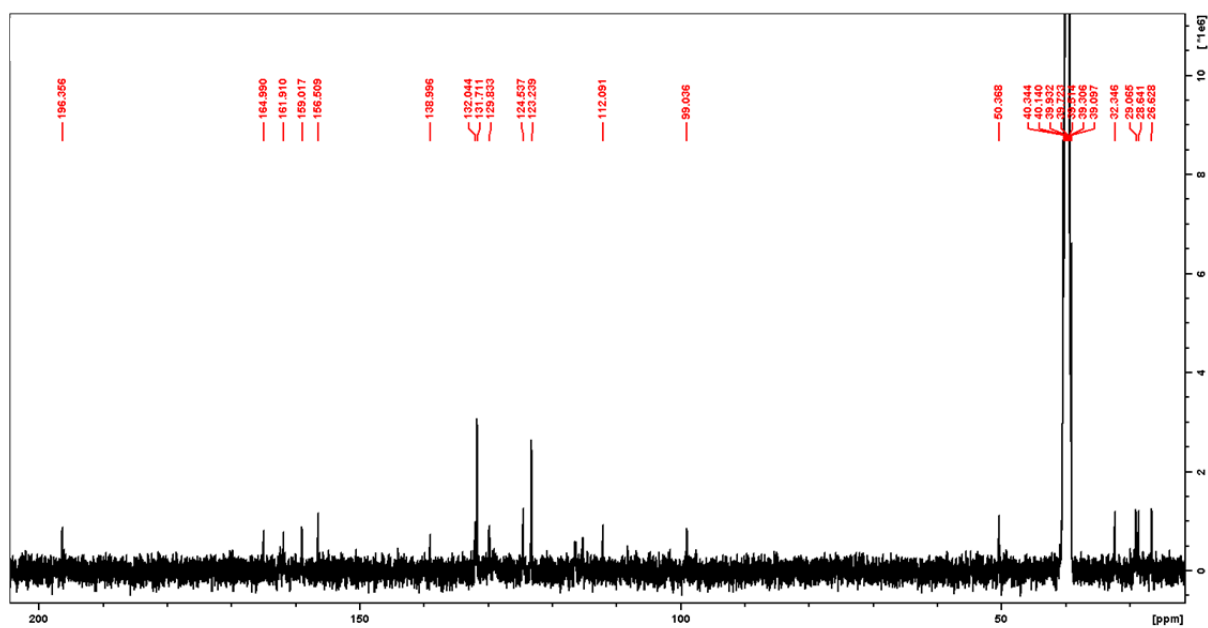

**Figure S7:** (a)  $^1\text{H}$  NMR and (b)  $^{13}\text{C}$  NMR spectra of **3g**



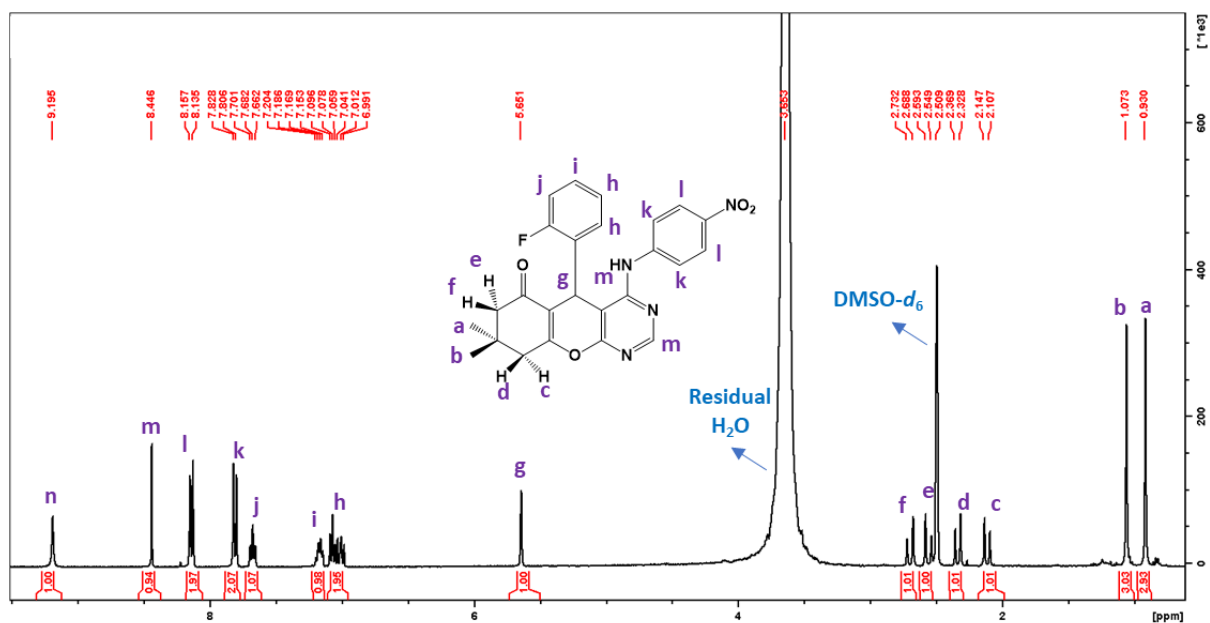

(a)

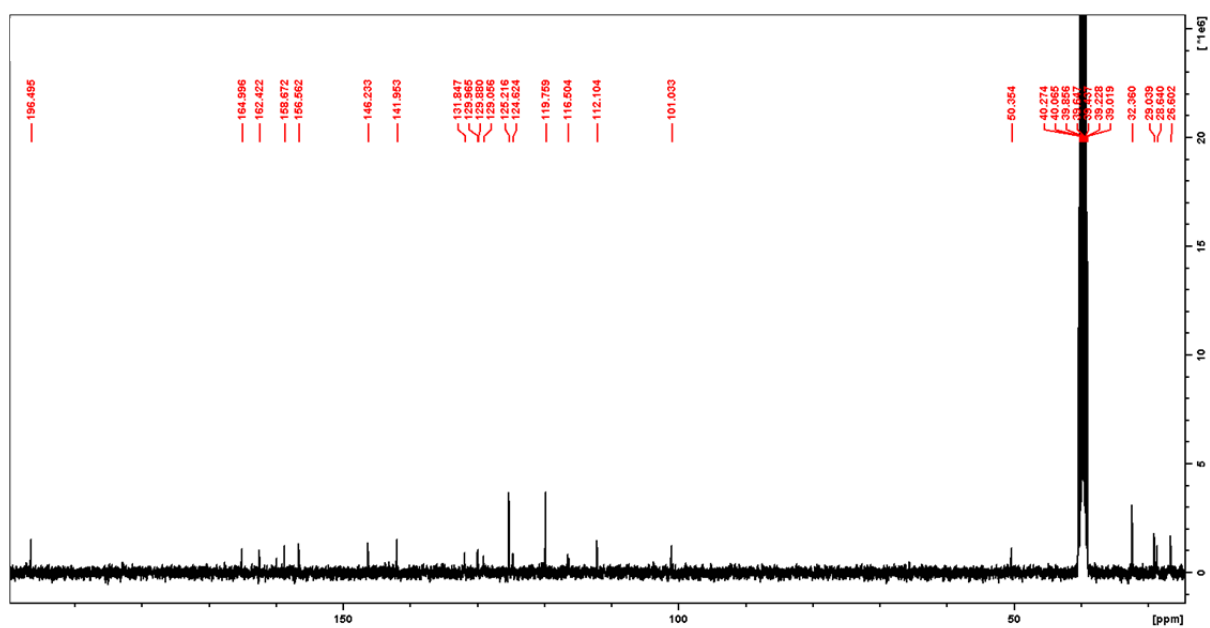

(b)

Figure S8: (a)  $^1\text{H}$  NMR and (b)  $^{13}\text{C}$  NMR spectra of **3h**

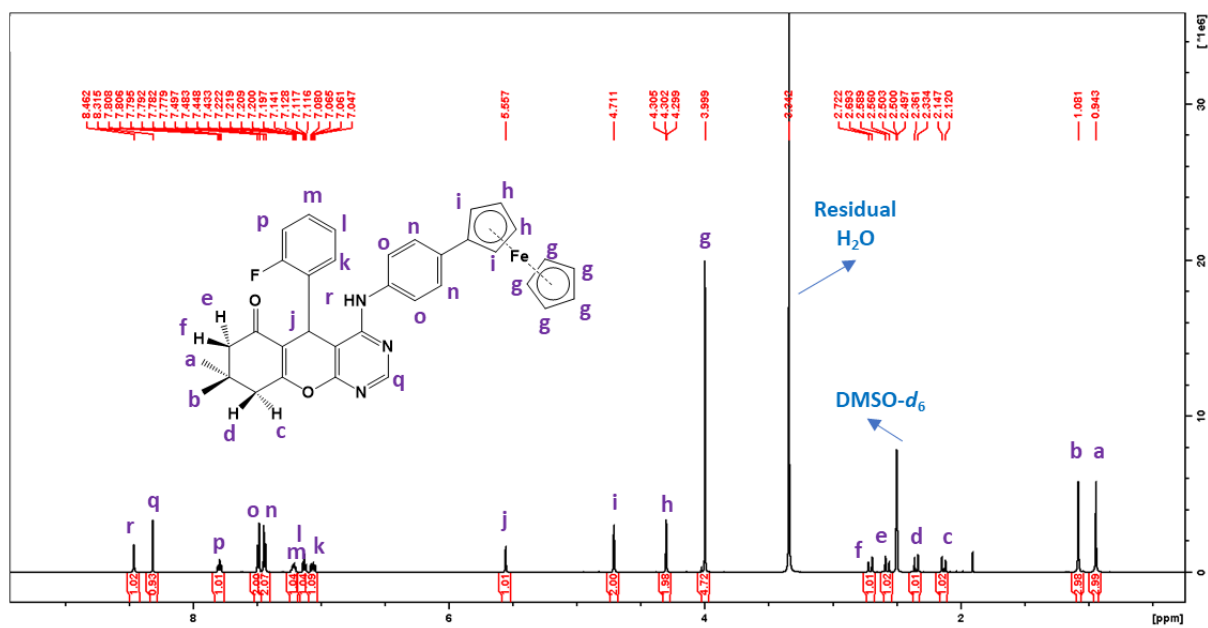

(a)

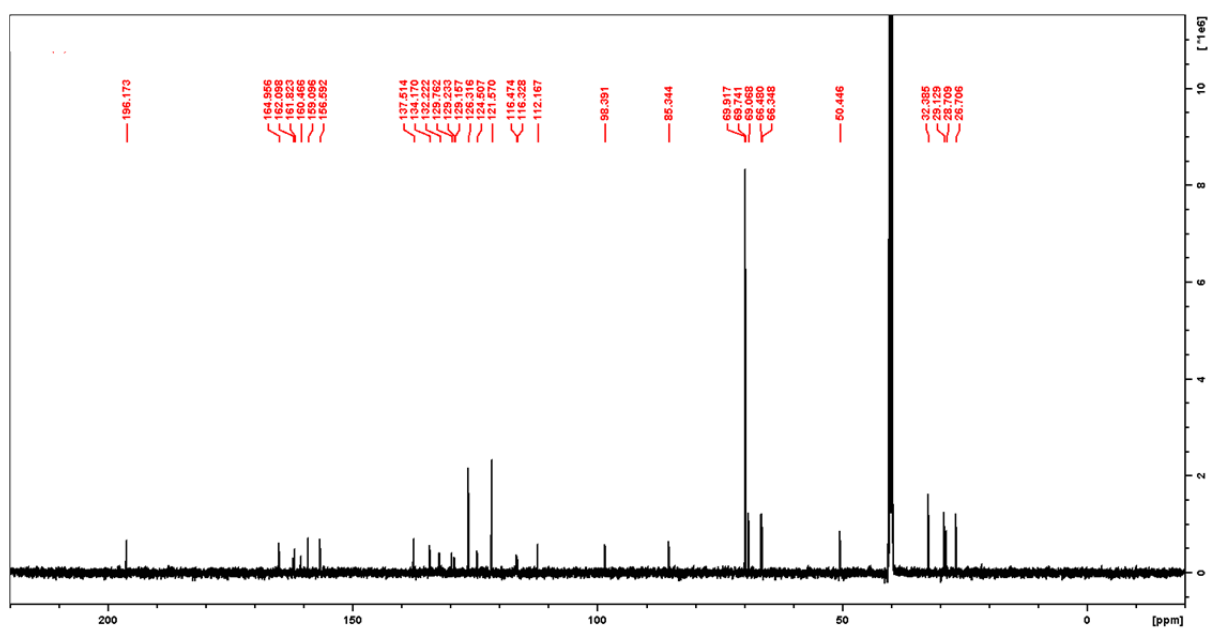

(b)

Figure S9: (a)  $^1\text{H}$  NMR and (b)  $^{13}\text{C}$  NMR spectra of **3i**

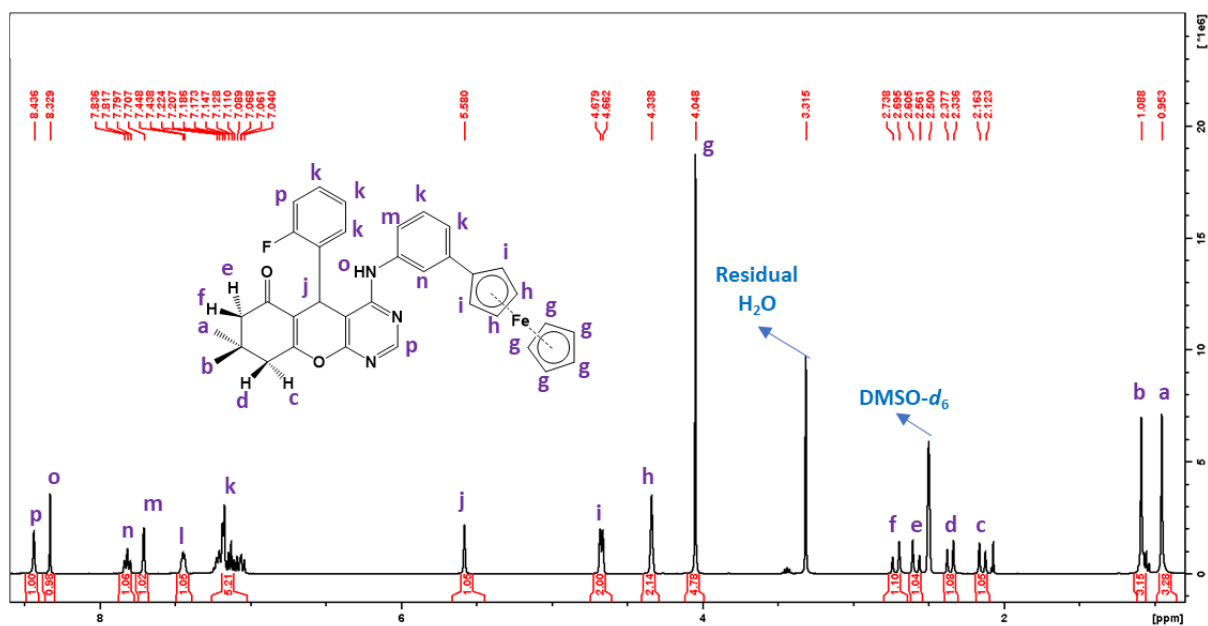

(a)

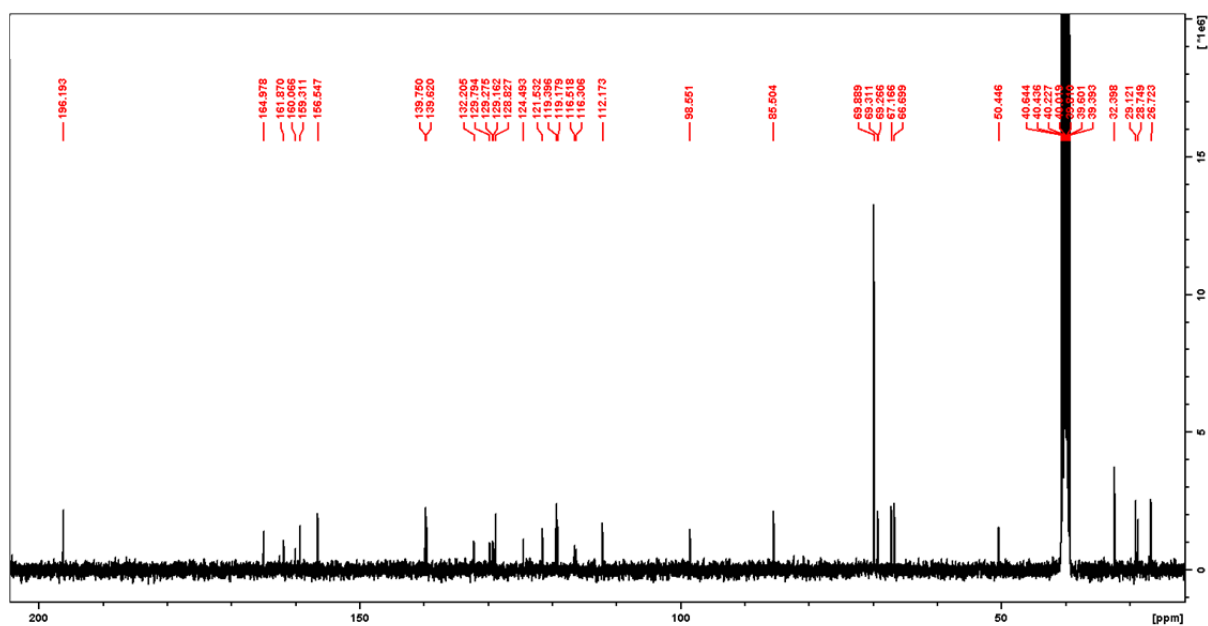

(b)

Figure S10: (a)  $^1\text{H}$  NMR and (b)  $^{13}\text{C}$  NMR spectra of **3j**

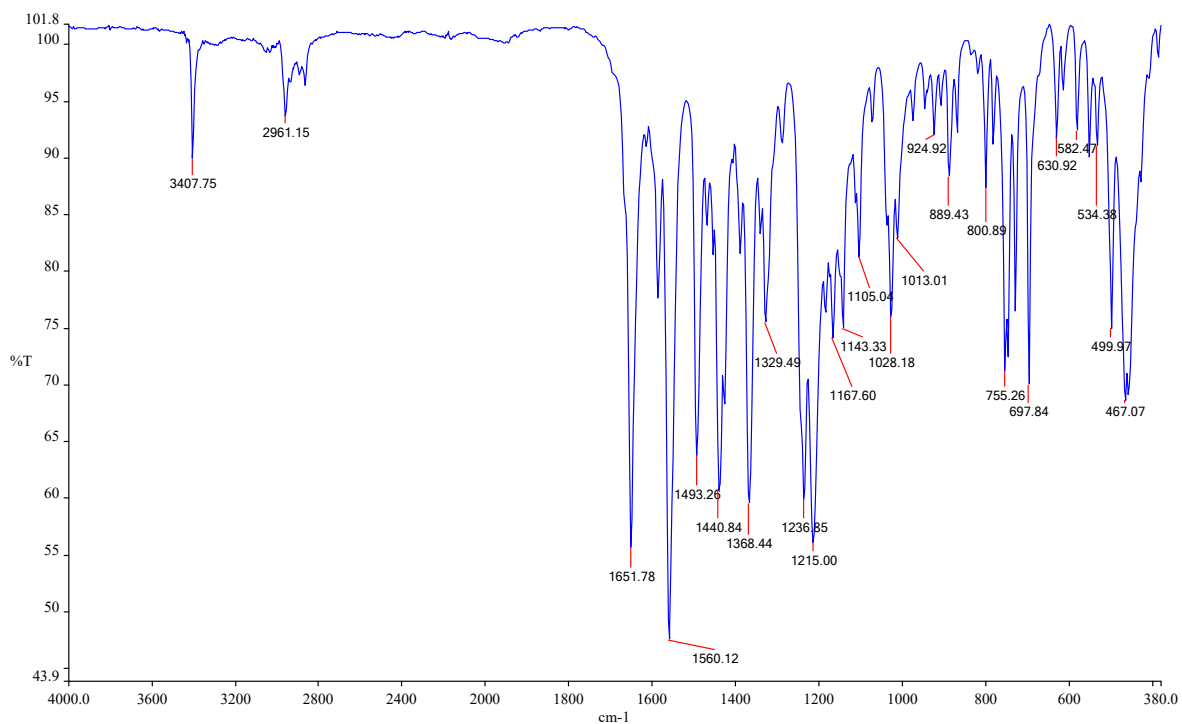

**Figure S11: IR spectrum of 3a**

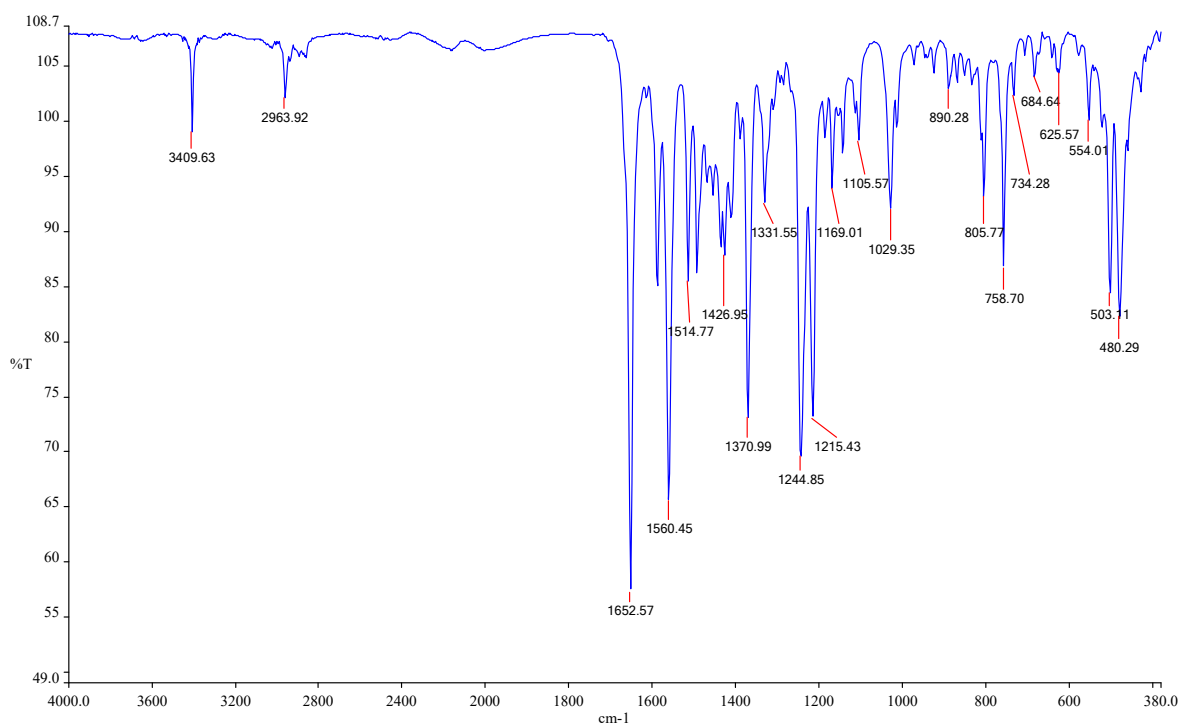

**Figure S12: IR spectrum of 3b**

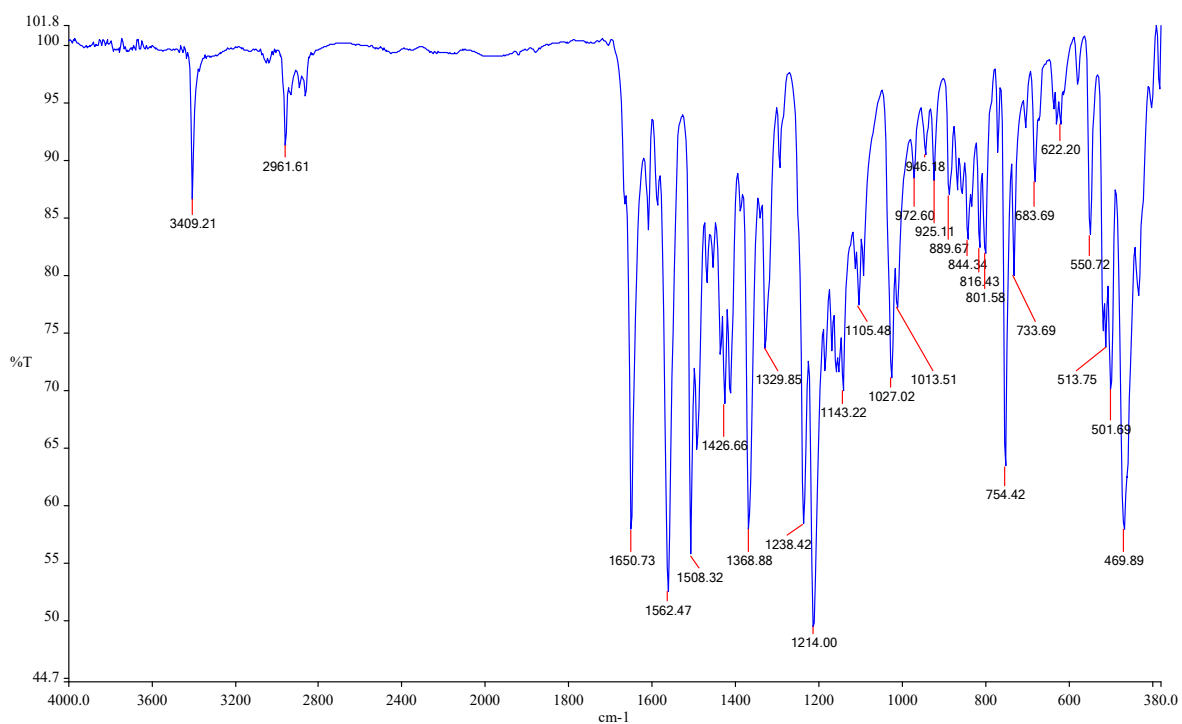

Figure S13: IR spectrum of 3c

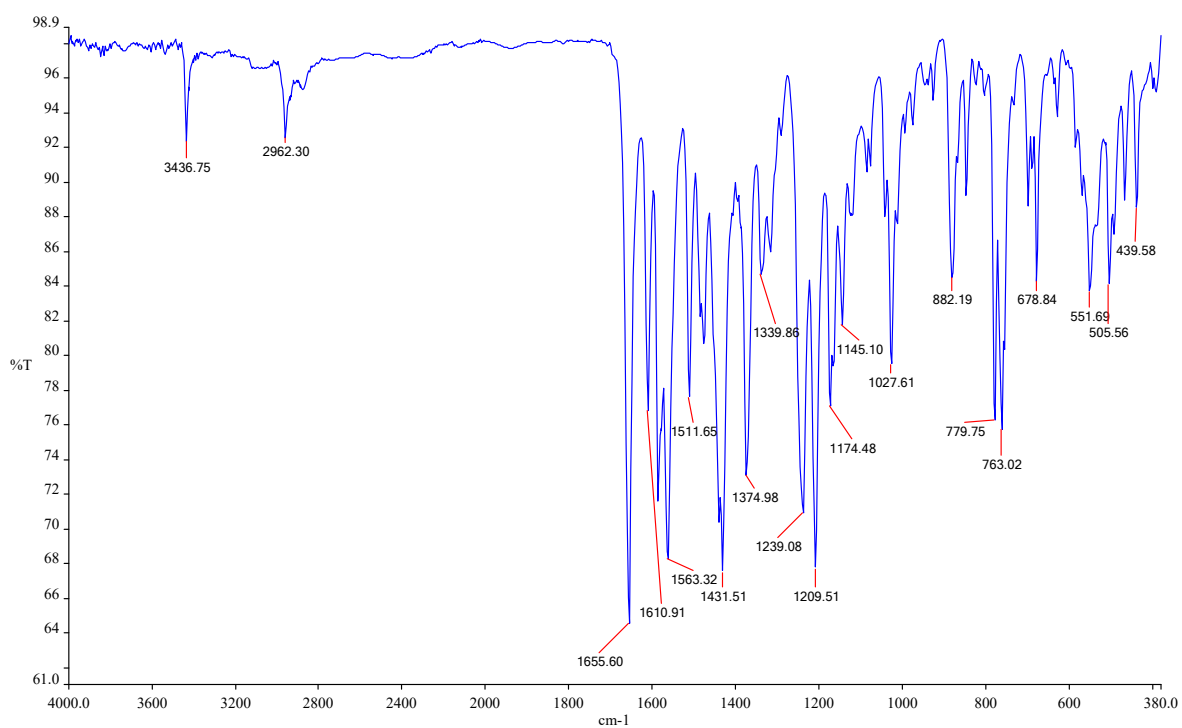

Figure S14: IR spectrum of 3d

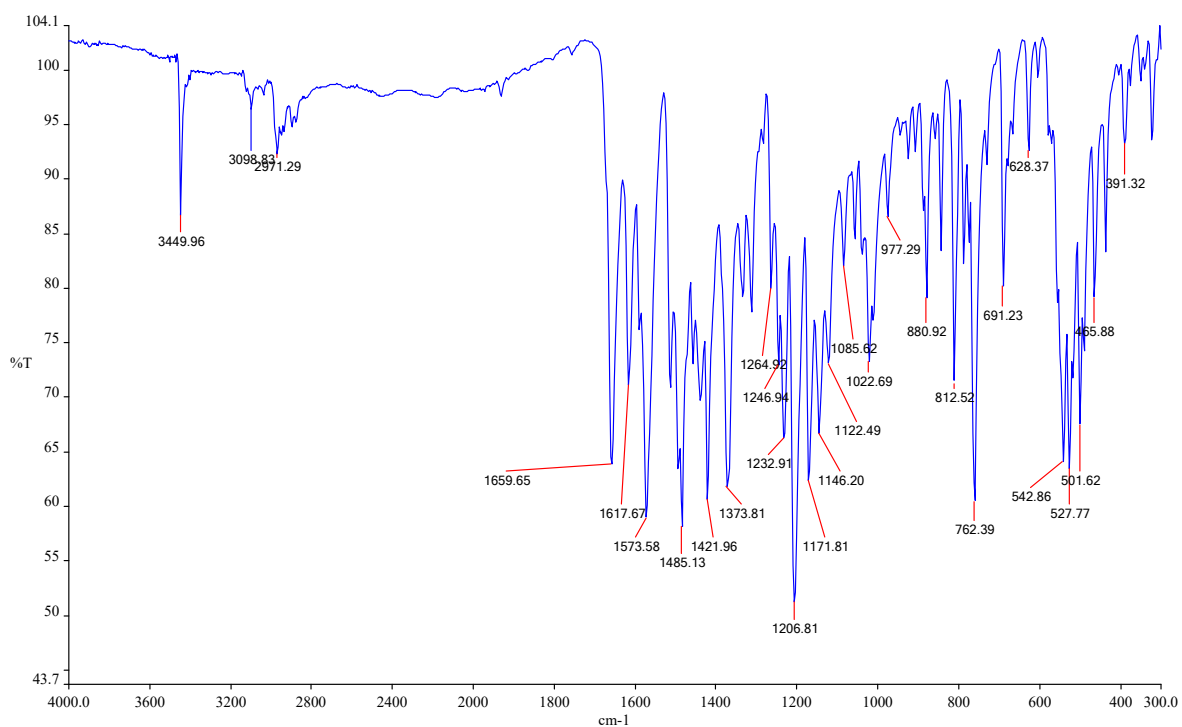

Figure S15: IR spectrum of 3e

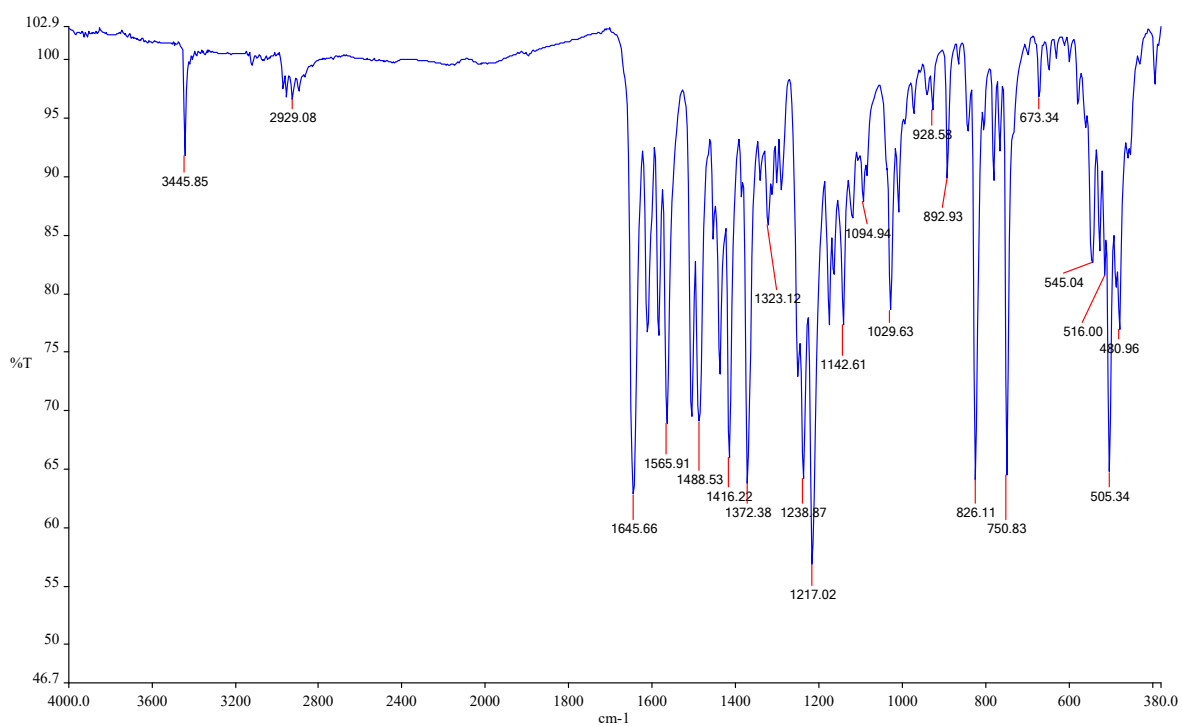

Figure S16: IR spectrum of 3f

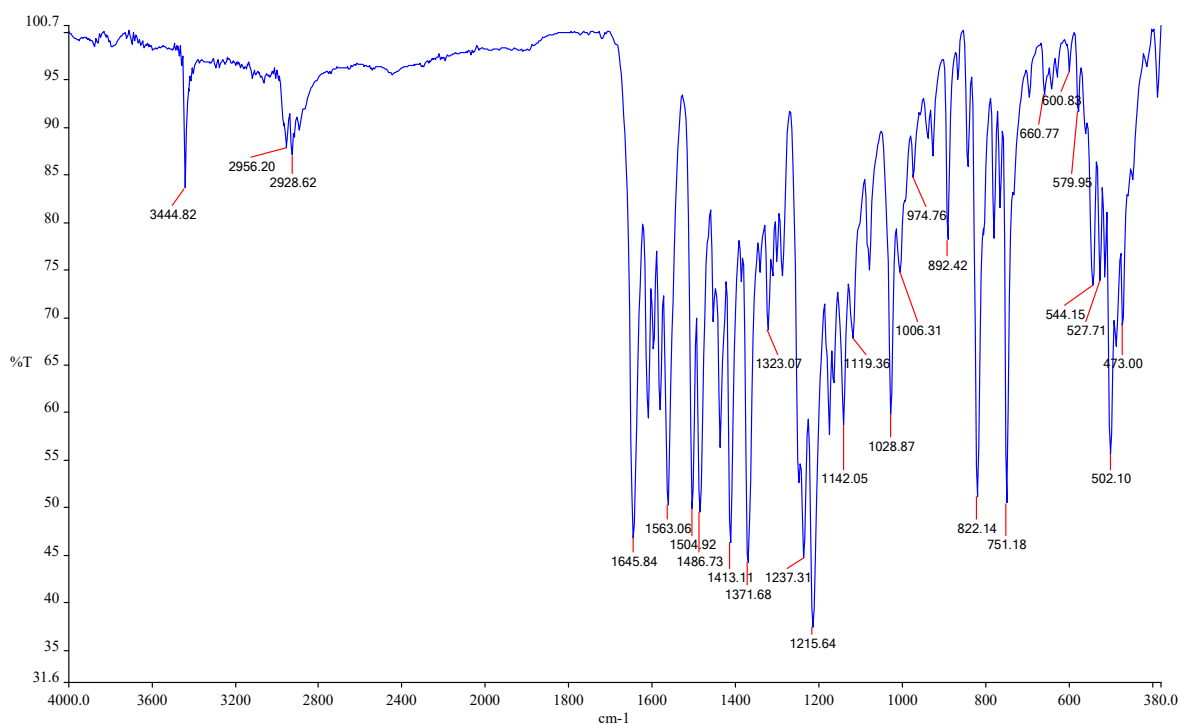

**Figure S17: IR spectrum of 3g**

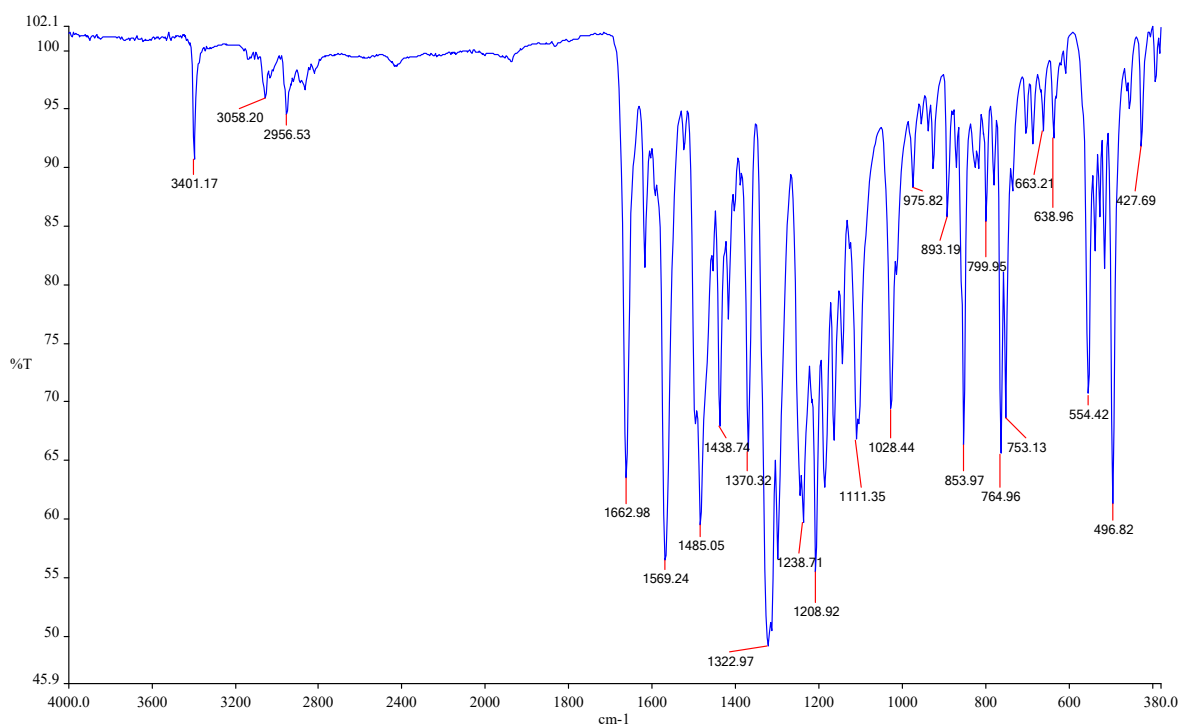

**Figure S18: IR spectrum of 3h**

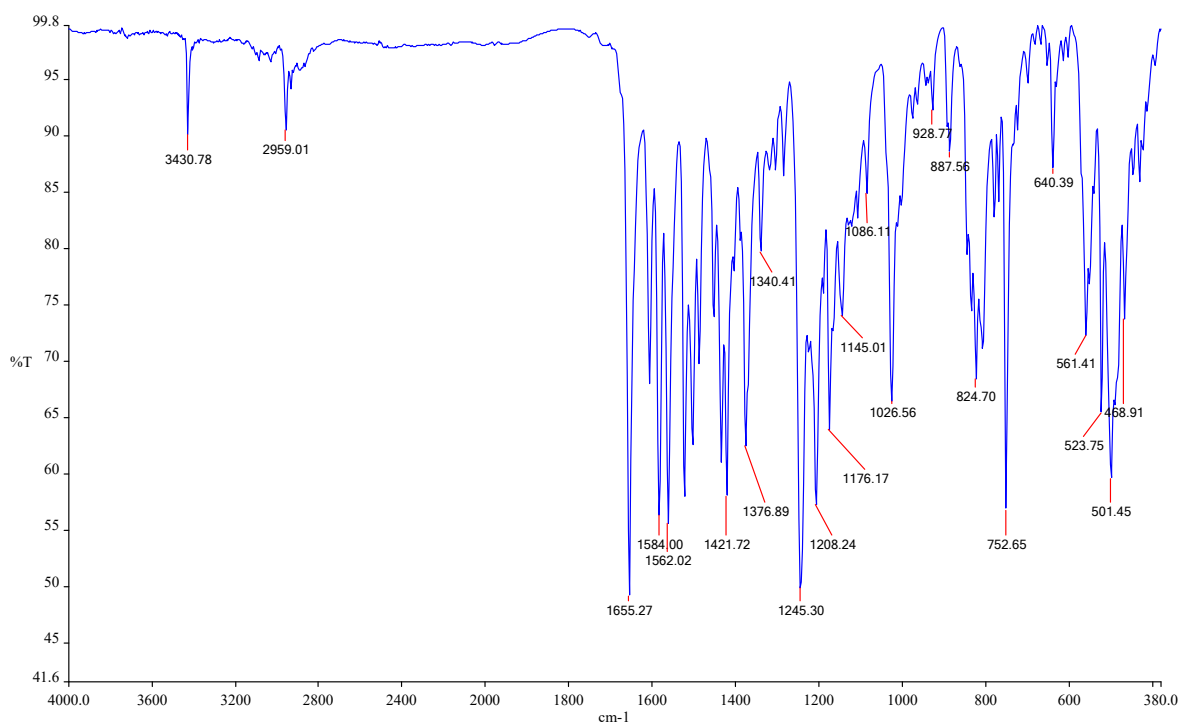

**Figure S19: IR spectrum of 3i**

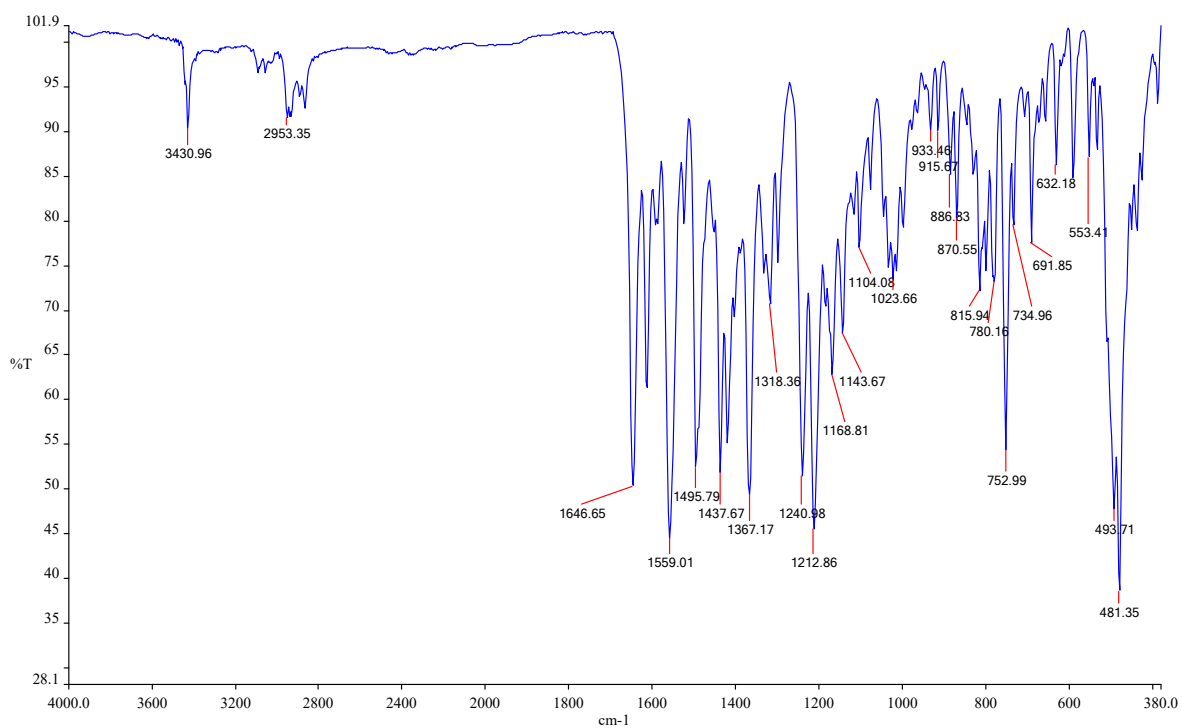

**Figure S20: IR spectrum of 3j**



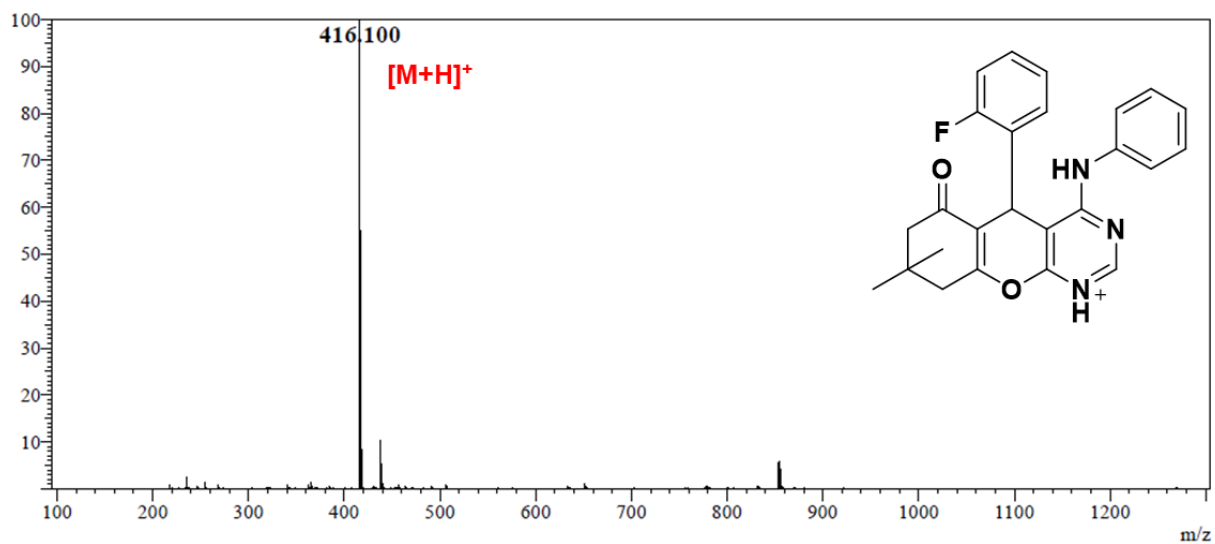

Figure S21: ESI(+)-MS of 3a

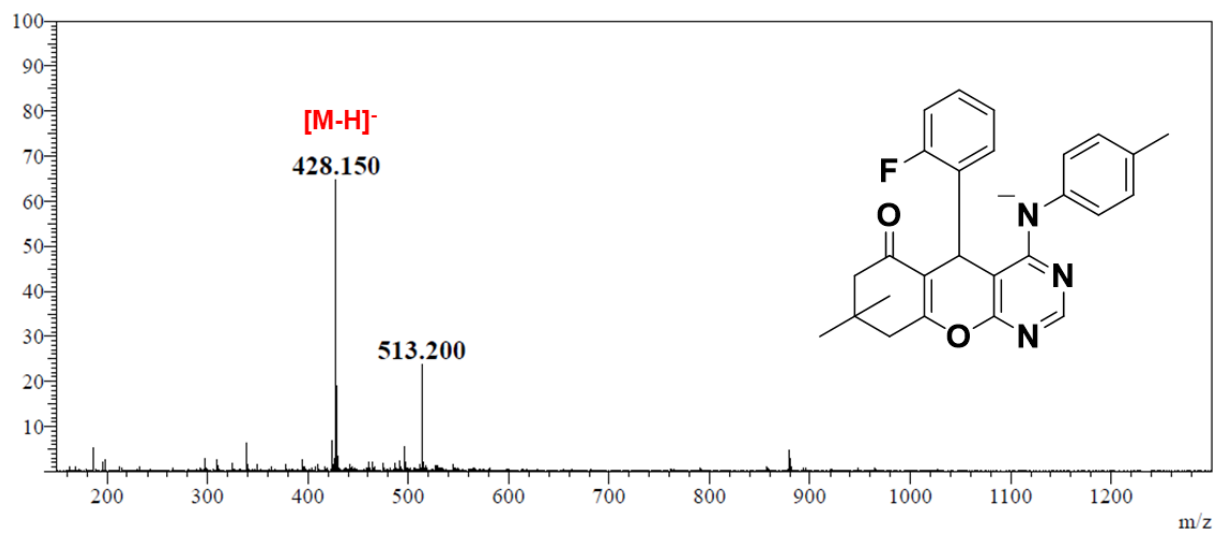

Figure S22: ESI(-)-MS of 3b

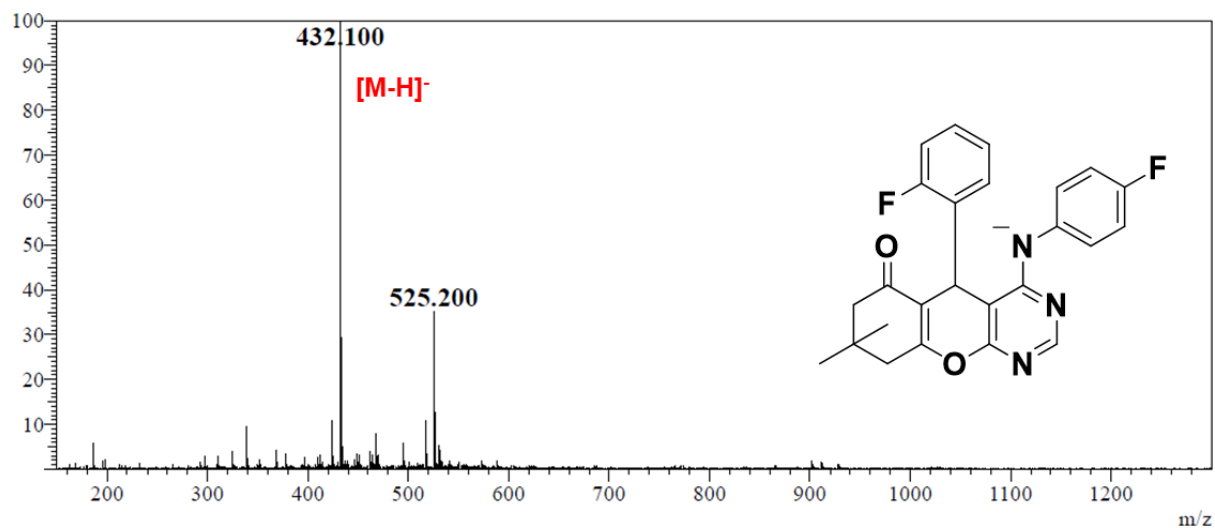

Figure S23: ESI(-)MS of 3c

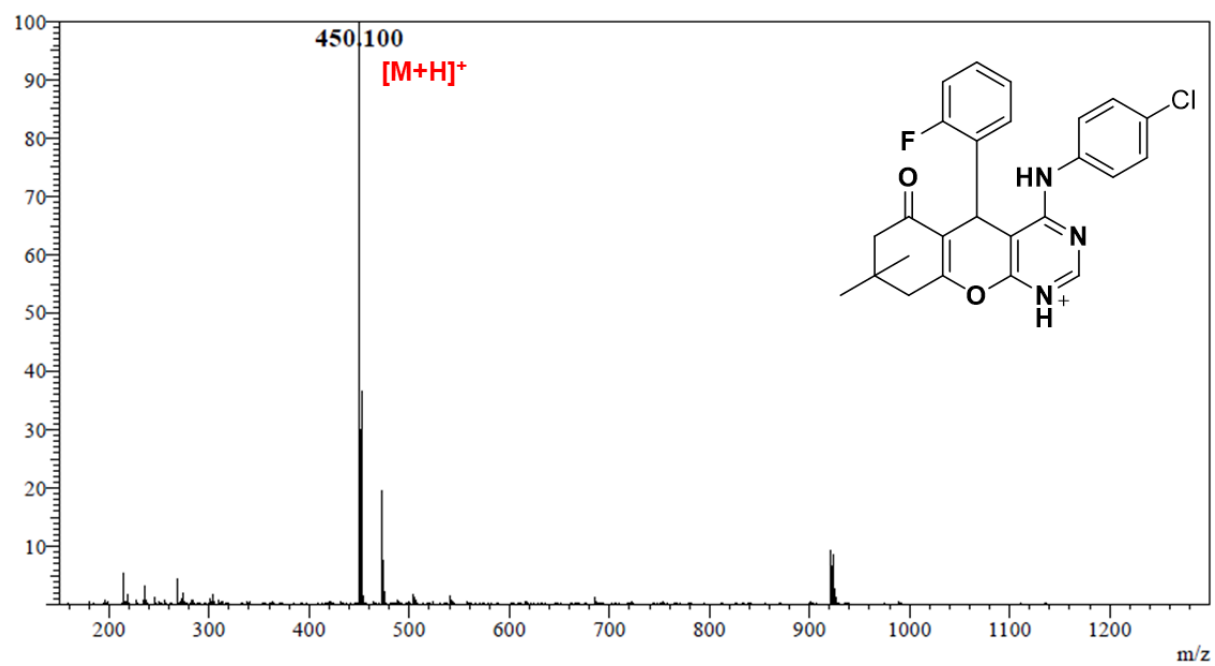

Figure S24: ESI(-)MS of 3d

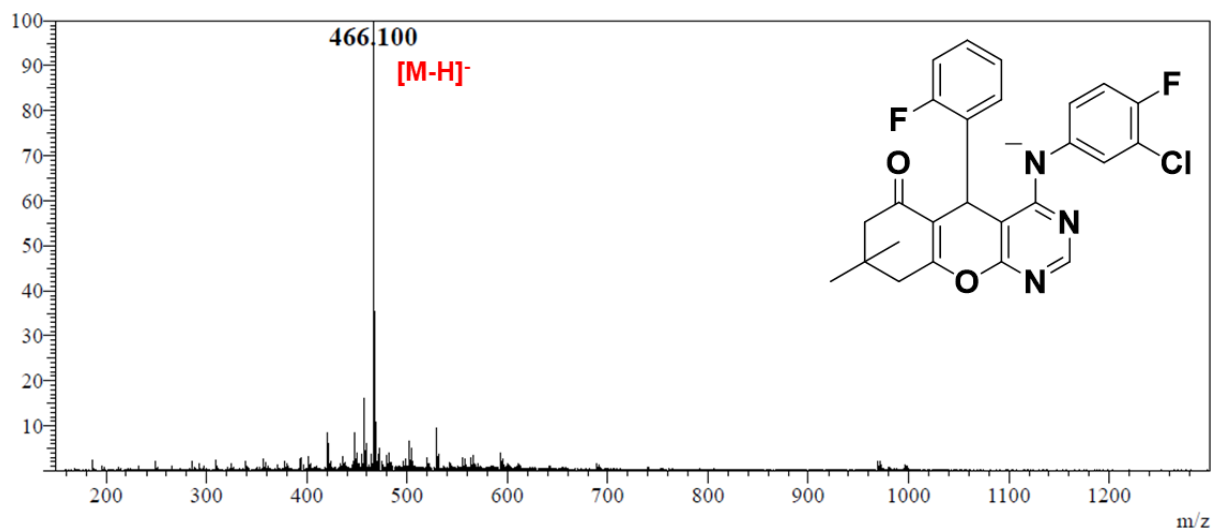

Figure S25: ESI(-)MS of 3e

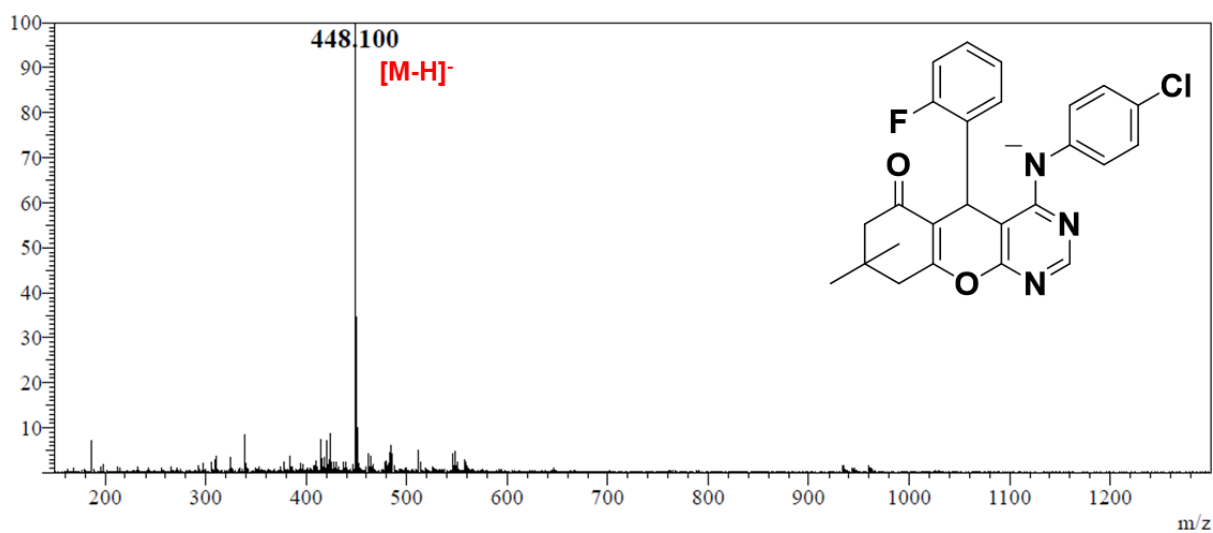

Figure S26: ESI(-)MS of 3f

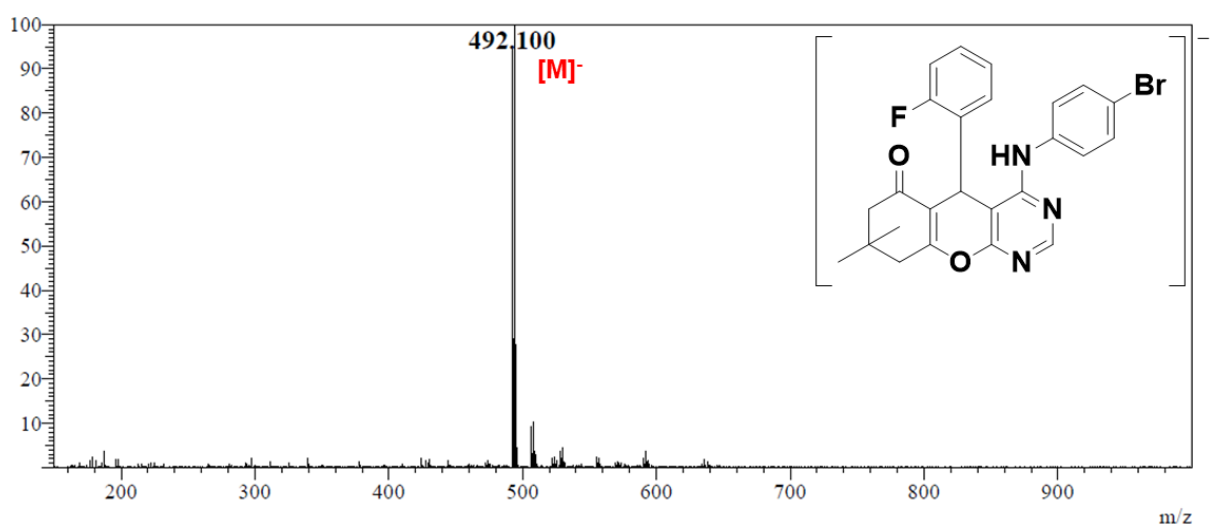

Figure S27: ESI(-)MS of 3g

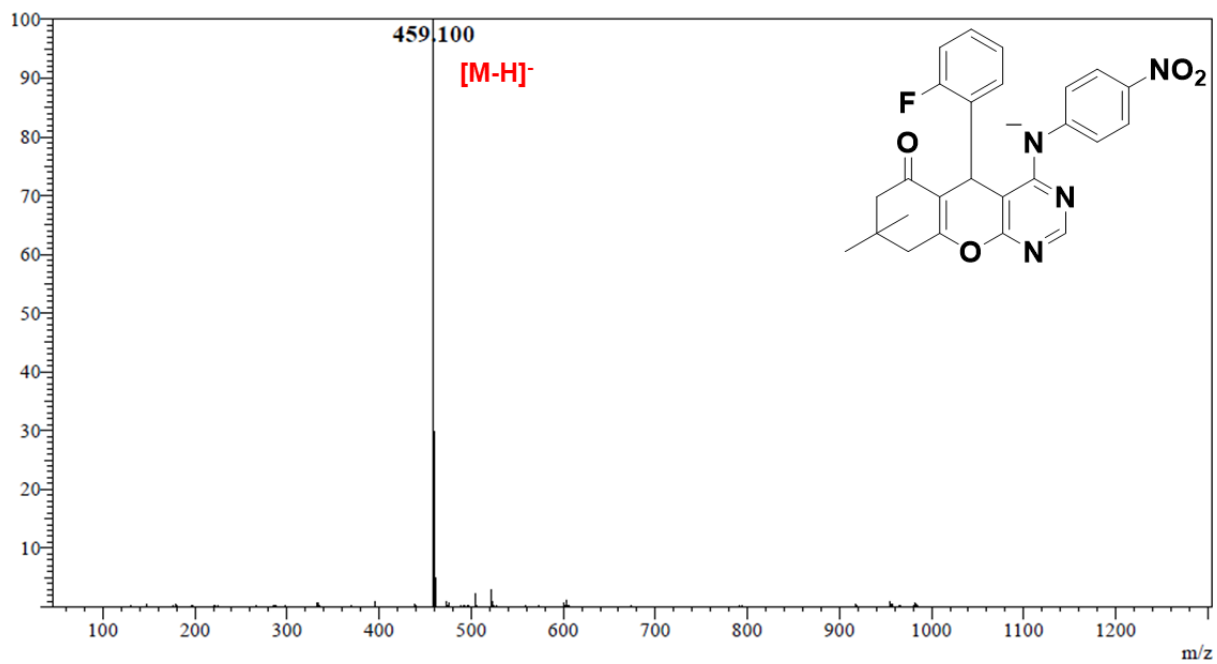

Figure S28: ESI(-)MS of **3h**

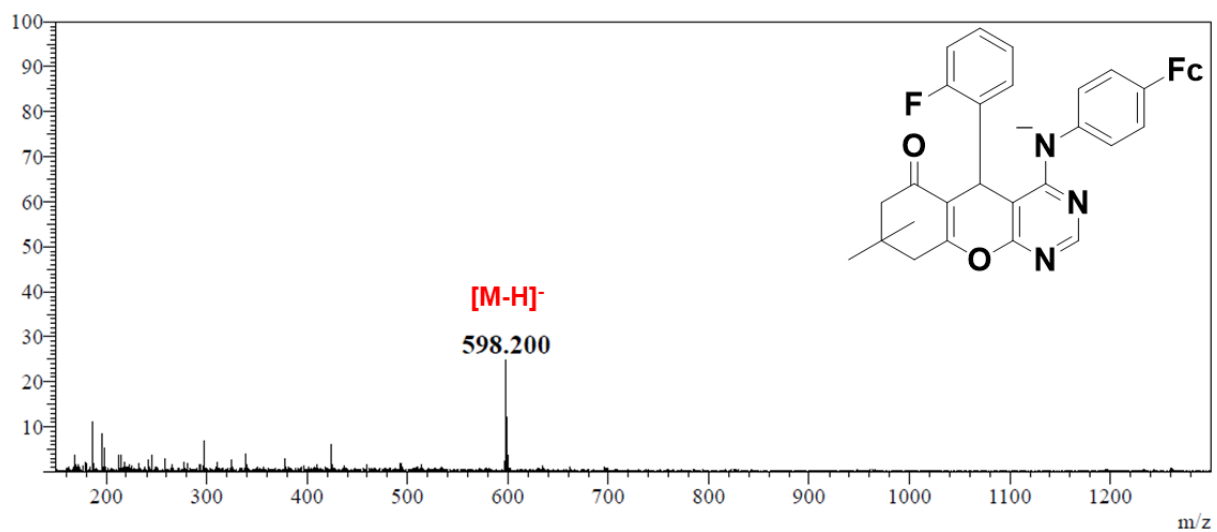

Figure S29: ESI(-)MS of **3i**

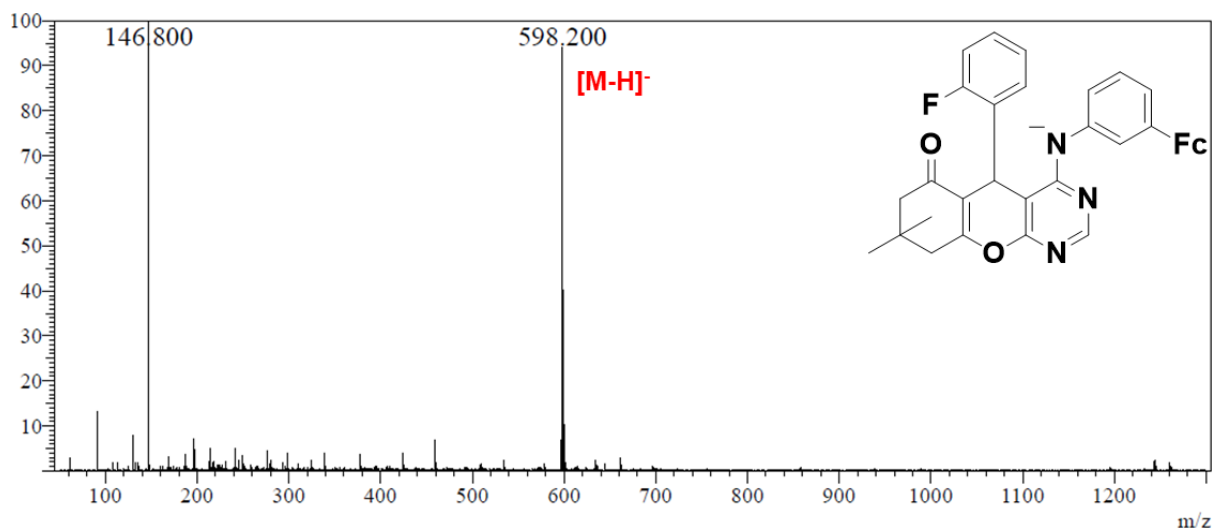

**Figure S30:** ESI(-)MS of **3j**

**Table S1:** Selected chemical shifts observed in the  $^1\text{H}$  NMR spectra of chromenopyrimidines and  $\text{pK}_a$  values of the corresponding aniline precursor used.

| Compound  | $^1\text{H}$ NMR                |                                 | $\text{pK}_a$     |
|-----------|---------------------------------|---------------------------------|-------------------|
|           | $\delta_{\text{NH}}/\text{ppm}$ | $\delta_{\text{CH}}/\text{ppm}$ |                   |
| <b>3a</b> | 8.49                            | 8.3                             | 4.61 <sup>a</sup> |
| <b>3b</b> | 8.37                            | 8.27                            | 5.04 <sup>a</sup> |
| <b>3c</b> | 8.55                            | 8.28                            | 4.66 <sup>a</sup> |
| <b>3d</b> | 8.6                             | 8.31                            | 3.54 <sup>a</sup> |
| <b>3e</b> | 8.72                            | 8.36                            | 3.60 <sup>a</sup> |
| <b>3f</b> | 8.64                            | 8.33                            | 3.97 <sup>a</sup> |
| <b>3g</b> | 8.64                            | 8.33                            | 3.90 <sup>a</sup> |
| <b>3h</b> | 9.2                             | 8.45                            | 1.01 <sup>a</sup> |
| <b>3i</b> | 8.46                            | 8.31                            | 4.78 <sup>b</sup> |
| <b>3j</b> | 8.44                            | 8.33                            | 4.88 <sup>b</sup> |

<sup>a</sup> Calculated using Advanced Chemistry Development (ACD/Labs), Software V11. 02 (1994–2013 ACD/Labs)

<sup>b</sup> Calculated from trendline equation of  $\text{pK}_a$  versus  $\delta_{\text{NH}}$  in Figure 1b

Representation of some hydrogen bonding patterns observed in the crystal packing of **3a**, **3b**,  
**3c**, **3e**, **3h** and **3j**

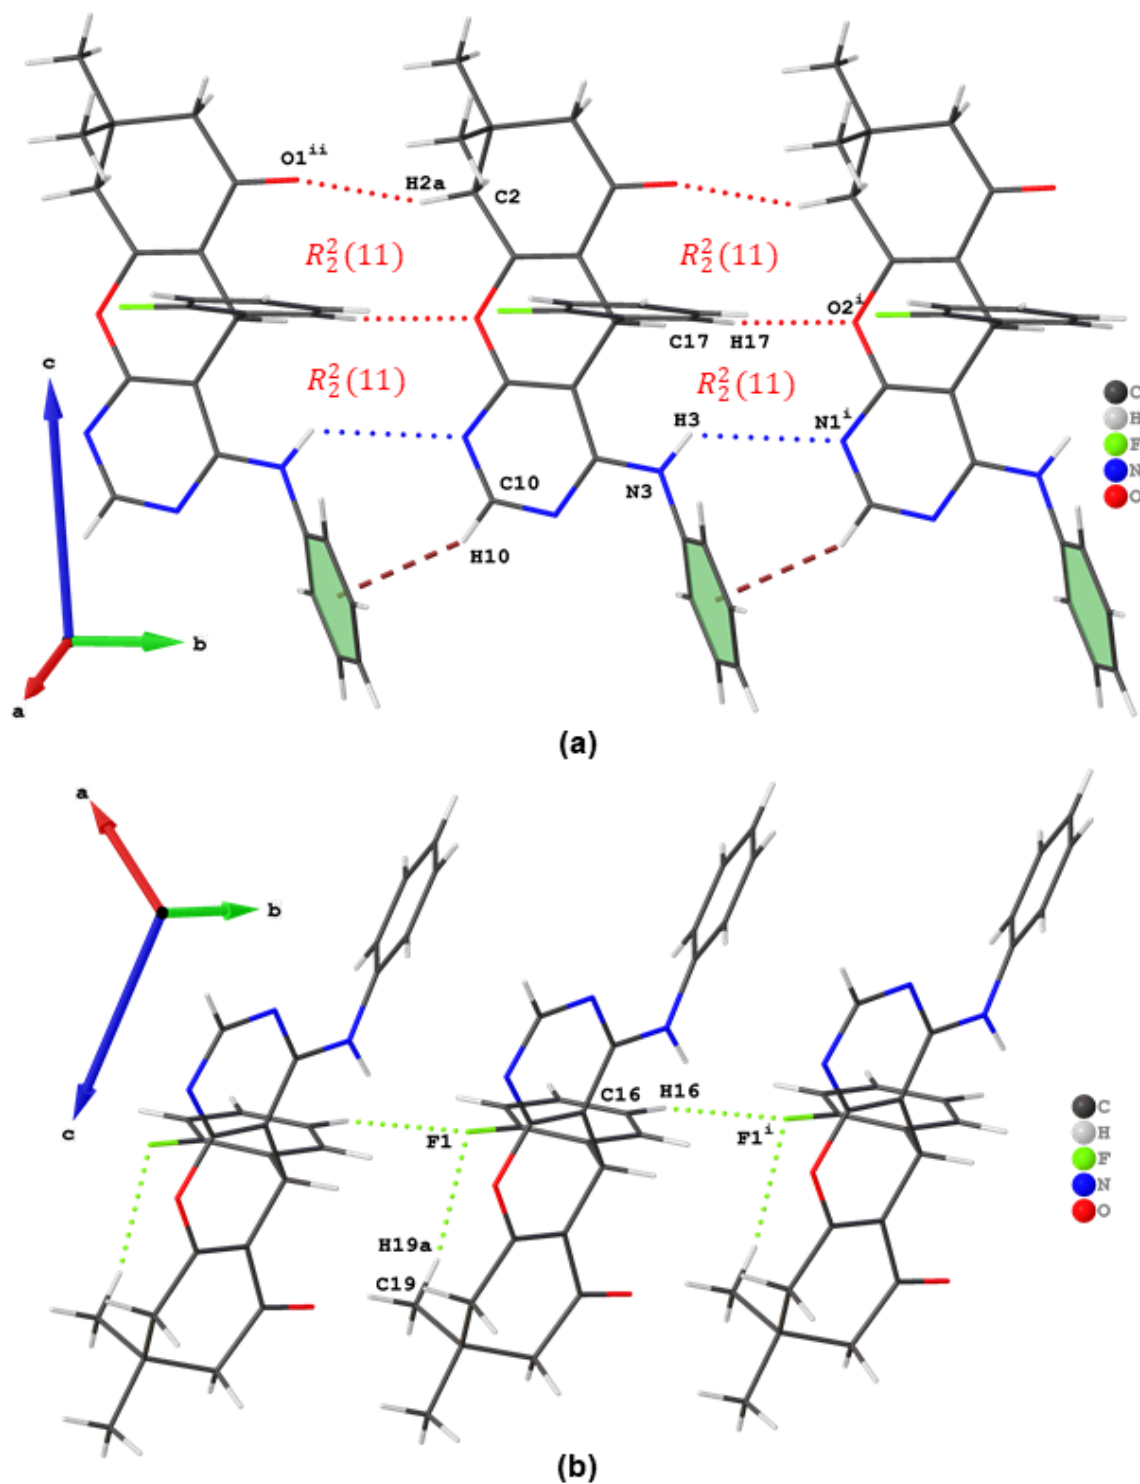

**Figure S31:** Representation of (a) intermolecular N—H...N, C—H...O, C—H... $\pi$ , and (b) C—H...F hydrogen bonding patterns in the crystal packing of **3a** to **3c**. The N—H...N, C—H...O, C—H... $\pi$ , and C—H...F interactions are drawn as dotted blue, red, brown and green bonds, respectively. The graphset descriptors that form ring motifs are shown in red text

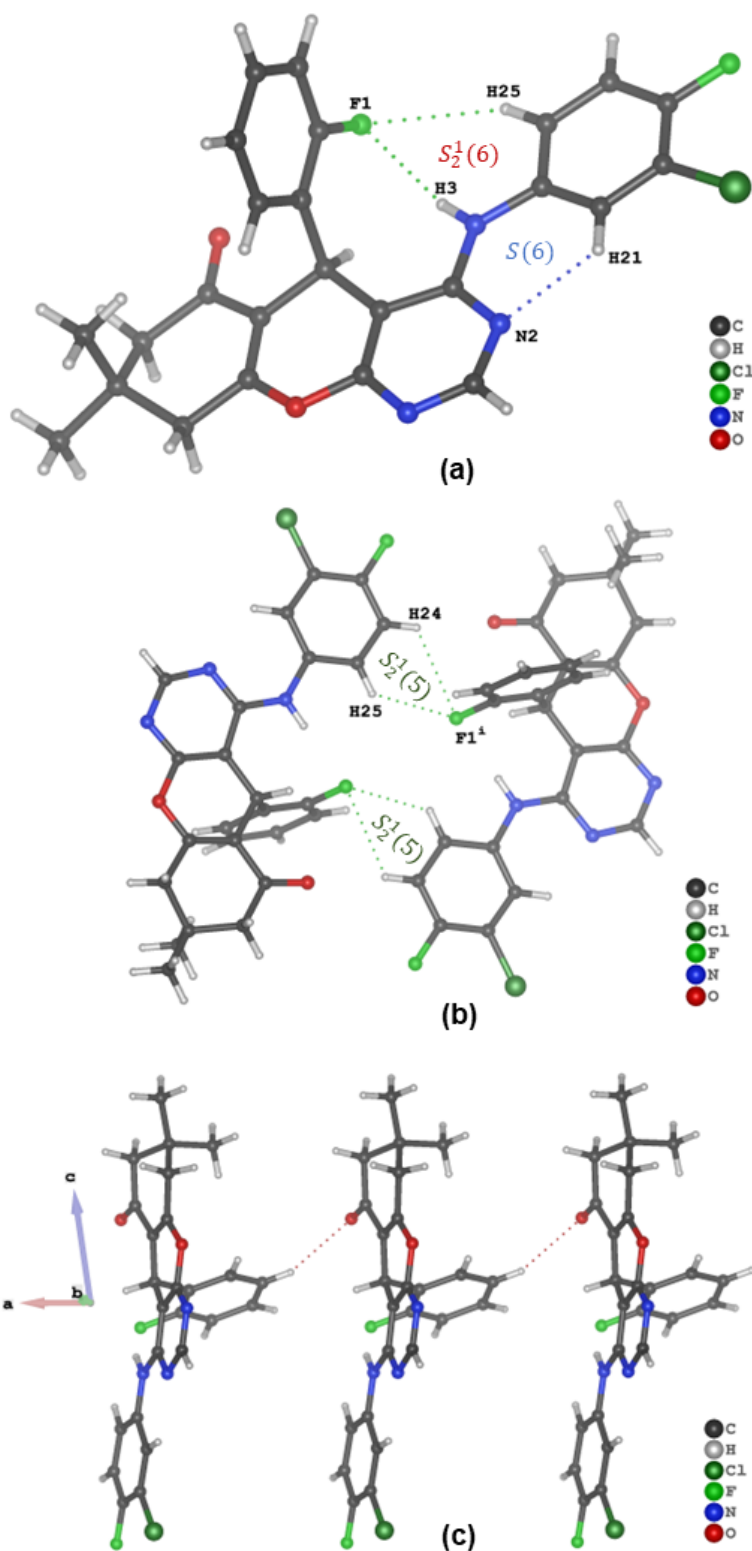

**Figure S32:** Representation of (a) intramolecular C—H...N, C—H...F, N—H...F, and intermolecular (b) C—H...F and (c) C—H...O hydrogen bonding patterns in the crystal packing of **3e**. The C...N, C—H...O and C—H...F interactions are drawn as dotted blue, red and green bonds, respectively. The graphset descriptors that form ring motifs are shown in red, blue and green text

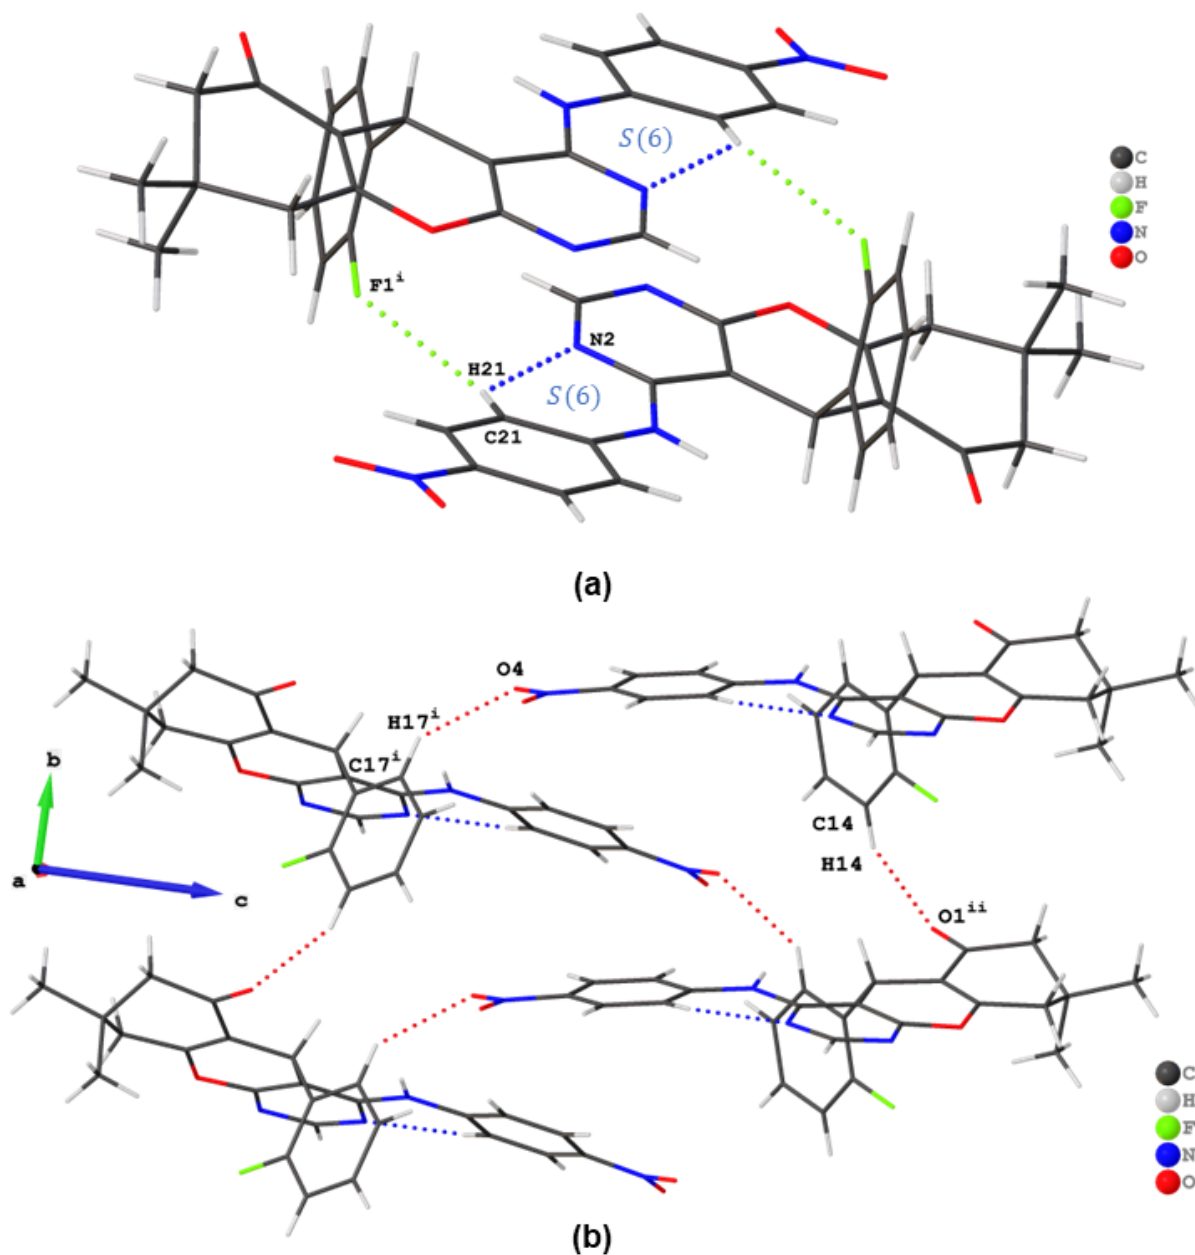

**Figure S33:** Representation of (a) intramolecular C—H...N, intermolecular C—H...F and (b) C—H...O hydrogen bonding patterns in the crystal packing of **3h**. The C—H...N, C—H...O and C—H...F interactions are drawn as dotted blue, red and green bonds, respectively. The graphset descriptors that form ring motifs are shown in blue text



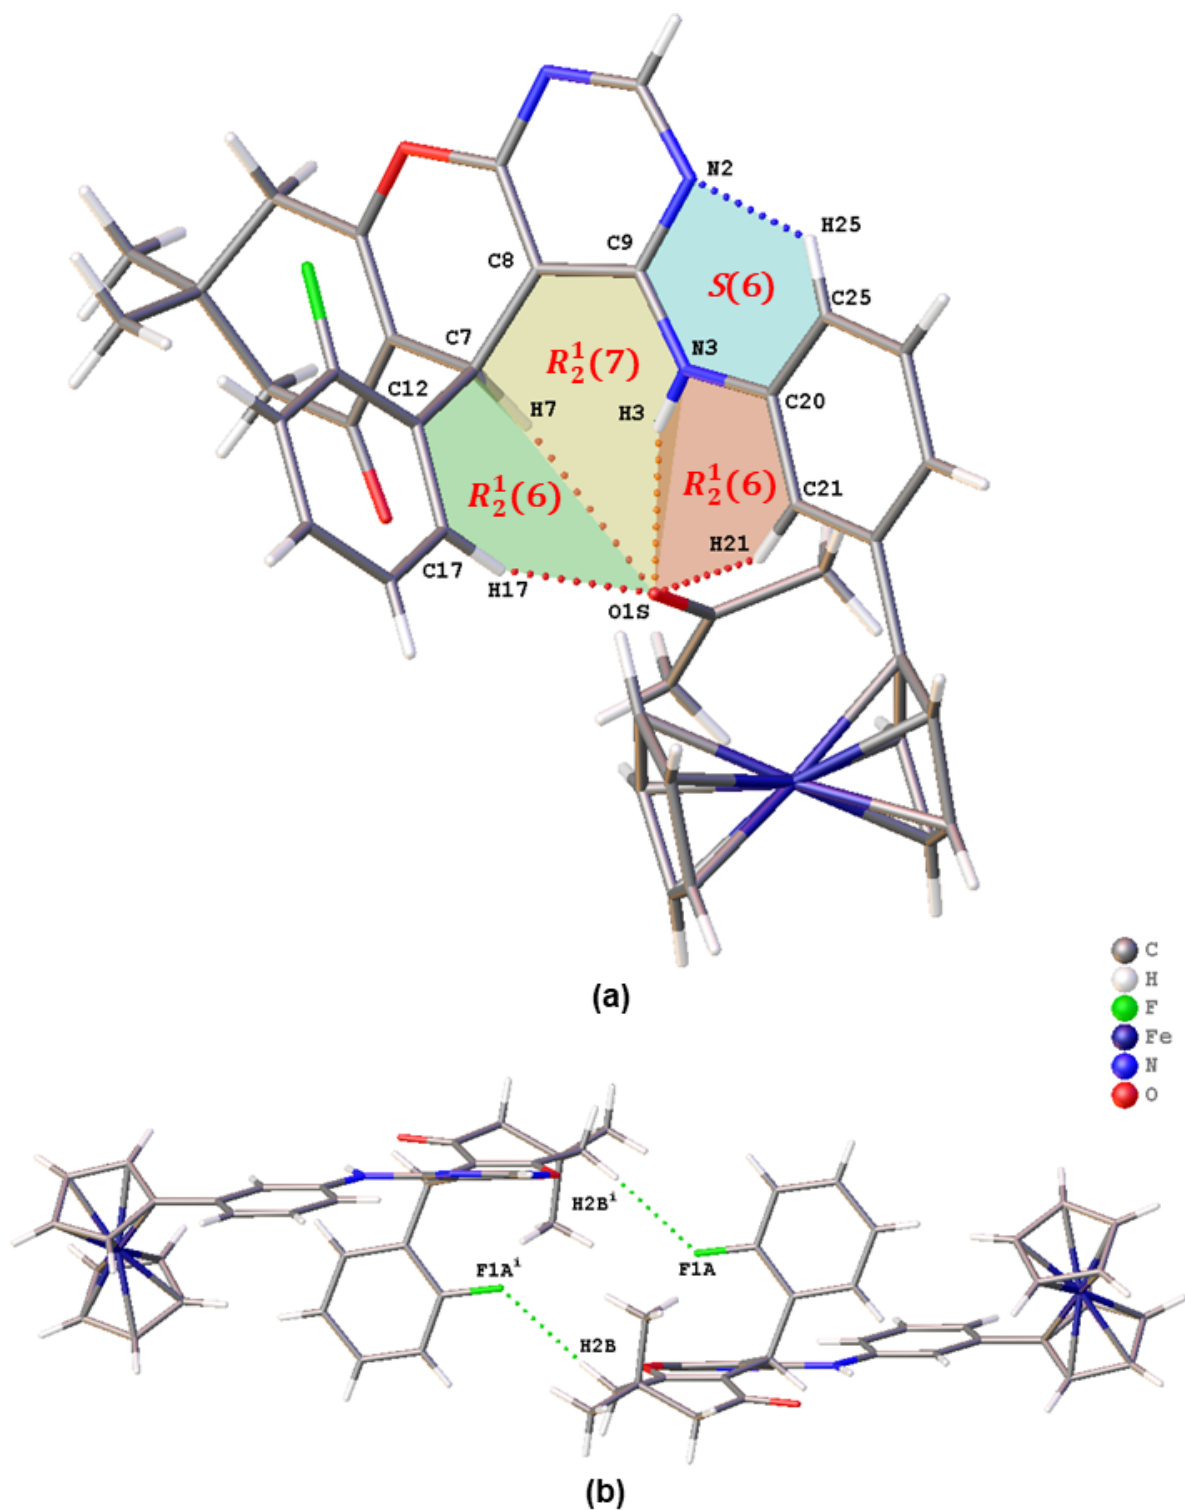

**Figure S34:** Representation of (a) intramolecular C—H...N, intermolecular N—H...O, C—H...O and (b) C—H...F hydrogen bonding patterns in the crystal packing of **3j**. The C—H...N, N—H...O, C—H...O and C—H...F interactions are drawn as dotted blue, orange, red and green bonds, respectively. The graphset descriptors that form ring motifs are shown in red text

**Table S2:** Geometric parameters of selected hydrogen bonding patterns in **3a** to **3c**, **3e**, **3h** and **3j**

| D-H...A                     | d(D-H)/Å | d(H...A)/Å | d(D...A)/Å | D-H...A/° |
|-----------------------------|----------|------------|------------|-----------|
| <b>Compound 3a</b>          |          |            |            |           |
| C2-H2A...O1 <sup>i</sup>    | 0.99     | 2.42       | 3.354(2)   | 156       |
| C16-H16...F1 <sup>ii</sup>  | 0.95     | 2.49       | 3.372(2)   | 155       |
| C17-H17...O2 <sup>ii</sup>  | 0.95     | 2.47       | 3.397(2)   | 165       |
| <b>Compound 3b</b>          |          |            |            |           |
| C2-H2A...N1 <sup>i</sup>    | 0.99     | 2.63       | 3.458(2)   | 142       |
| C2-H2B...O1 <sup>ii</sup>   | 0.99     | 2.46       | 3.383(2)   | 155       |
| C18-H18...F1 <sup>iii</sup> | 0.95     | 2.52       | 3.410(2)   | 155       |
| C19-H19...O2 <sup>iii</sup> | 0.95     | 2.49       | 3.414(2)   | 165       |
| <b>Compound 3c</b>          |          |            |            |           |
| C2-H2A...O1 <sup>i</sup>    | 0.99     | 2.42       | 3.353(1)   | 156       |
| C18-H18...F1 <sup>ii</sup>  | 0.95     | 2.49       | 3.369(1)   | 154       |
| C19-H19...O2 <sup>ii</sup>  | 0.95     | 2.48       | 3.406(1)   | 166       |
| <b>Compound 3e</b>          |          |            |            |           |
| N3-H3...F1                  | 0.88     | 2.22       | 3.059(2)   | 159       |
| C16-H16...O1 <sup>i</sup>   | 0.95     | 2.55       | 3.451(2)   | 159       |
| C21-H21...N2                | 0.95     | 2.26       | 2.887(2)   | 122       |
| C24-H24...F1 <sup>ii</sup>  | 0.95     | 2.77       | 3.363(2)   | 121       |
| C25-H25...F1                | 0.95     | 2.69       | 3.452(2)   | 138       |
| C25-H25...F1 <sup>ii</sup>  | 0.95     | 2.68       | 3.327(2)   | 126       |
| <b>Compound 3h</b>          |          |            |            |           |
| C21-H21...F1 <sup>i</sup>   | 0.95     | 2.45       | 3.071(2)   | 123       |
| C21-H21...N2                | 0.95     | 2.25       | 2.866(2)   | 122       |
| C14-H14...O1 <sup>ii</sup>  | 0.95     | 2.27       | 3.144(2)   | 152       |
| C17-H17...O4 <sup>iii</sup> | 0.95     | 2.45       | 3.244(2)   | 141       |
| <b>Compound 3j</b>          |          |            |            |           |
| C21—H21...O1S               | 0.95     | 2.55       | 3.387(2)   | 147       |
| N3—H3...O1S                 | 0.88     | 2.38       | 3.215(2)   | 159       |
| C7—H7...O1S                 | 0.99     | 2.60       | 3.520(2)   | 153       |
| C17—H17...O1S               | 0.95     | 2.37       | 3.264(3)   | 157       |
| C2—H2B...F1A <sup>i</sup>   | 0.99     | 2.57       | 3.508(2)   | 158       |
| C25—H25...N2                | 0.95     | 2.26       | 2.875(2)   | 122       |

Symmetry codes: **3a** (i)  $x, -1+y, z$ ; (ii)  $x, -1+y, z$ ; **3b** (i) (i)  $x, -1+y, z$ ; (ii)  $x, -1+y, z$ ; **3c** (i) (i)  $x, -1+y, z$ ; (ii)  $x, -1+y, z$ ; **3e** (i)  $-1+x, y, z$ ; (ii)  $1-x, 1-y, 1-z$ ; **3h** (i)  $3/2-x, -1/2-y, -z$ ; (ii)  $x, -1+y, z$ ; (iii)  $3/2-x, 1/2+y, -1/2-z$ ; **3j** (i)  $2-x, -y, -z$

**Table S3:** Crystallographic data and structural refinement details for **3a** to **3c**, **3e**, **3h** and **3j**

|                                                                            | <b>3a</b>                                                      | <b>3b</b>                                                      | <b>3c</b>                                                                    | <b>3e</b>                                                                      | <b>3h</b>                                                      | <b>3j</b>                                                                                         |
|----------------------------------------------------------------------------|----------------------------------------------------------------|----------------------------------------------------------------|------------------------------------------------------------------------------|--------------------------------------------------------------------------------|----------------------------------------------------------------|---------------------------------------------------------------------------------------------------|
| Chemical formula                                                           | C <sub>25</sub> H <sub>22</sub> FN <sub>3</sub> O <sub>2</sub> | C <sub>26</sub> H <sub>24</sub> FN <sub>3</sub> O <sub>2</sub> | C <sub>25</sub> H <sub>21</sub> F <sub>2</sub> N <sub>3</sub> O <sub>2</sub> | C <sub>25</sub> H <sub>20</sub> ClF <sub>2</sub> N <sub>3</sub> O <sub>2</sub> | C <sub>25</sub> H <sub>21</sub> FN <sub>4</sub> O <sub>4</sub> | C <sub>35</sub> H <sub>30</sub> FFeN <sub>3</sub> O <sub>2</sub> ·C <sub>3</sub> H <sub>6</sub> O |
| $M_r$                                                                      | 415.45                                                         | 429.48                                                         | 433.45                                                                       | 467.89                                                                         | 460.46                                                         | 657.55                                                                                            |
| Crystal system, space group                                                | Monoclinic, $P2_1/c$                                           | Monoclinic, $P2_1/c$                                           | Monoclinic, $P2_1/c$                                                         | Triclinic, $P1$                                                                | Monoclinic, $I2/c$                                             | Monoclinic, $P2_1/n$                                                                              |
| Temperature (K)                                                            | 100                                                            | 100                                                            | 100                                                                          | 100                                                                            | 100                                                            | 150                                                                                               |
| $a, b, c$ (Å)                                                              | 12.0927 (4), 7.3784 (2), 21.8294 (7)                           | 12.1596 (4), 7.4148 (3), 23.0902 (9)                           | 12.1368 (3), 7.3737 (2), 22.1506 (5)                                         | 7.2220 (1), 10.4778 (2), 14.4403 (3)                                           | 21.5323 (4), 6.9303 (1), 29.2911 (7)                           | 11.1910 (3), 10.9002 (3), 25.9816 (8)                                                             |
| $\alpha, \beta, \gamma$ (°)                                                | 90, 93.390 (2), 90                                             | 90, 96.662 (2), 90                                             | 90, 94.506 (1), 90                                                           | 75.338 (1), 82.465 (1), 85.928 (1)                                             | 90, 93.555 (1), 90                                             | 90, 97.846 (2), 90                                                                                |
| $V$ (Å <sup>3</sup> )                                                      | 1944.32 (10)                                                   | 2067.78 (13)                                                   | 1976.20 (9)                                                                  | 1047.18 (3)                                                                    | 4362.56 (15)                                                   | 3139.67 (16)                                                                                      |
| $Z$                                                                        | 4                                                              | 4                                                              | 4                                                                            | 2                                                                              | 8                                                              | 4                                                                                                 |
| $\mu$ (mm <sup>-1</sup> )                                                  | 0.10                                                           | 0.10                                                           | 0.11                                                                         | 0.23                                                                           | 0.10                                                           | 0.53                                                                                              |
| Crystal size (mm)                                                          | 0.34 × 0.21 × 0.14                                             | 0.27 × 0.15 × 0.11                                             | 0.39 × 0.37 × 0.32                                                           | 0.36 × 0.31 × 0.24                                                             | 0.27 × 0.22 × 0.13                                             | 0.22 × 0.19 × 0.14                                                                                |
| $T_{\min}, T_{\max}$                                                       | 0.955, 0.998                                                   | 0.964, 0.998                                                   | 0.951, 0.978                                                                 | 0.910, 0.957                                                                   | 0.652, 0.746                                                   | 0.882, 0.940                                                                                      |
| No. of measured, independent and observed [ $I > 2\sigma(I)$ ] reflections | 13125, 3863, 2987                                              | 13147, 4230, 3118                                              | 32619, 4921, 4579                                                            | 21374, 5268, 4808                                                              | 17399, 5402, 4369                                              | 22501, 6680, 5505                                                                                 |
| $R_{\text{int}}$                                                           | 0.031                                                          | 0.028                                                          | 0.020                                                                        | 0.027                                                                          | 0.022                                                          | 0.025                                                                                             |
| $(\sin \theta/\lambda)_{\text{max}}$ (Å <sup>-1</sup> )                    | 0.627                                                          | 0.629                                                          | 0.670                                                                        | 0.675                                                                          | 0.670                                                          | 0.643                                                                                             |
| $R[F^2 > 2\sigma(F^2)], wR(F^2), S$                                        | 0.0403, 0.0910, 1.034                                          | 0.0423, 0.0909, 1.008                                          | 0.0394, 0.1029, 1.042                                                        | 0.0402, 0.1116, 1.057                                                          | 0.0358, 0.0897, 1.017                                          | 0.0371, 0.0897, 1.035                                                                             |
| No. of reflections                                                         | 3863                                                           | 4230                                                           | 4921                                                                         | 5268                                                                           | 5402                                                           | 6680                                                                                              |
| $\Delta\rho_{\text{max}}, \Delta\rho_{\text{min}}$ (e Å <sup>-3</sup> )    | 0.23, -0.41                                                    | 0.29, -0.24                                                    | 0.33, -0.36                                                                  | 1.19, -0.37                                                                    | 0.35, -0.23                                                    | 0.99, -0.36                                                                                       |

Electronic absorption spectra: DNA and BSA binding affinity

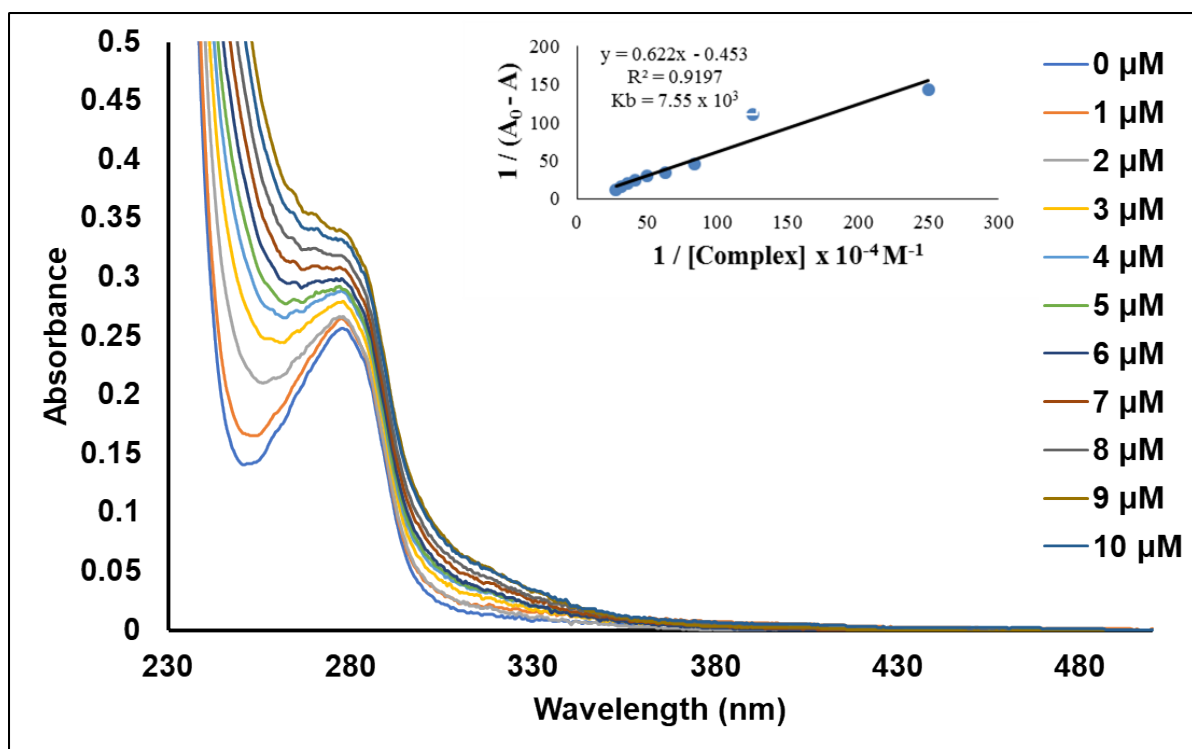

(a)

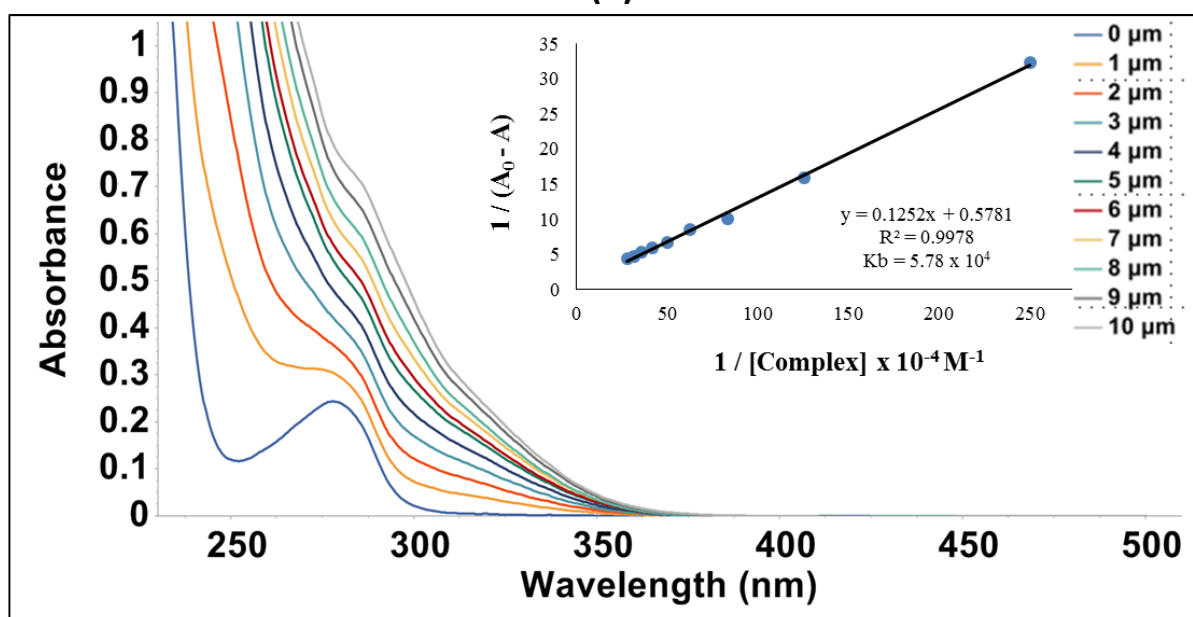

(b)

Figure S35: Absorption spectra of BSA in the absence and presence of increasing amounts of (a) i-a and (b) i-b.

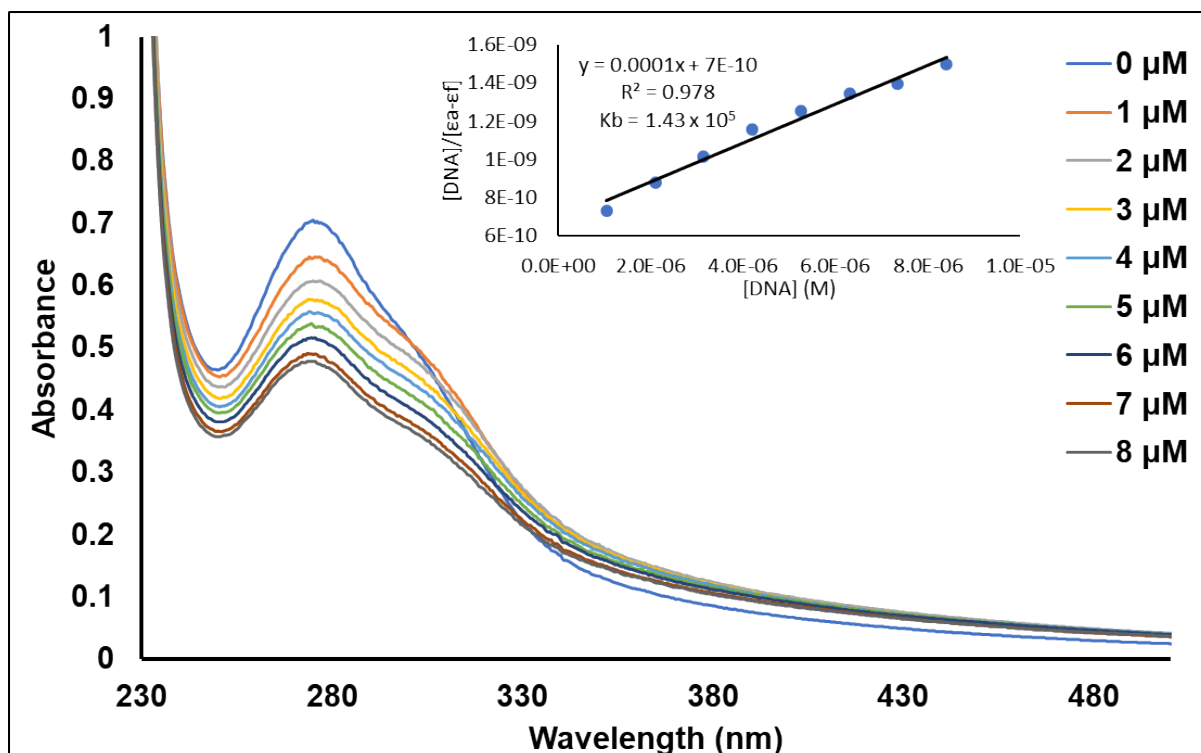

(a)

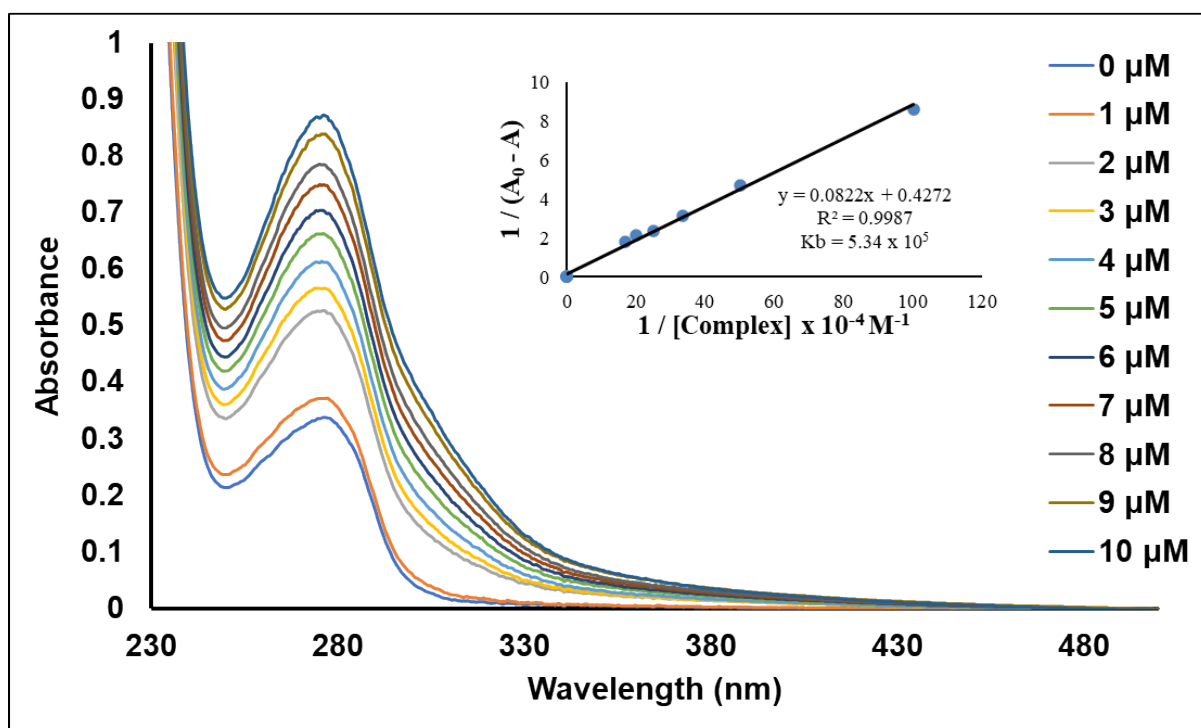

(b)

**Figure S36:** (a) Absorption spectra of **3a** in the absence and presence of increasing amounts of CT-DNA and (b) absorption spectra of BSA in the absence and presence of increasing amounts of **3a**.

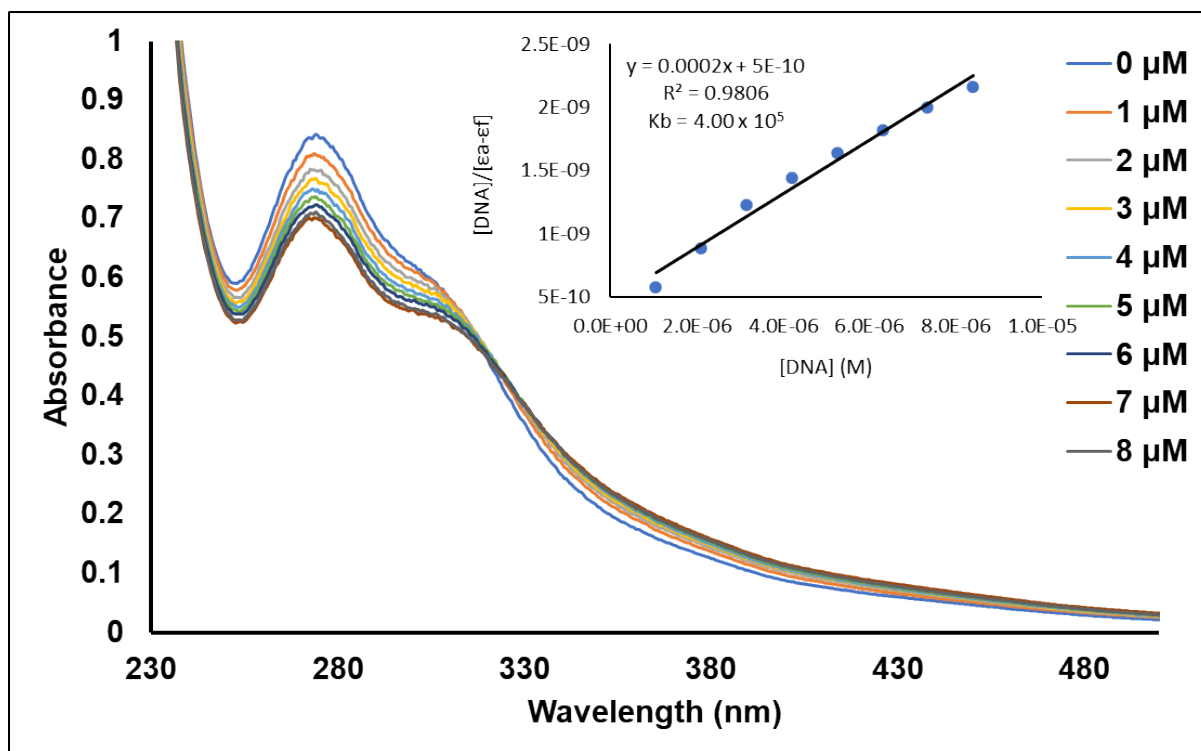

(a)

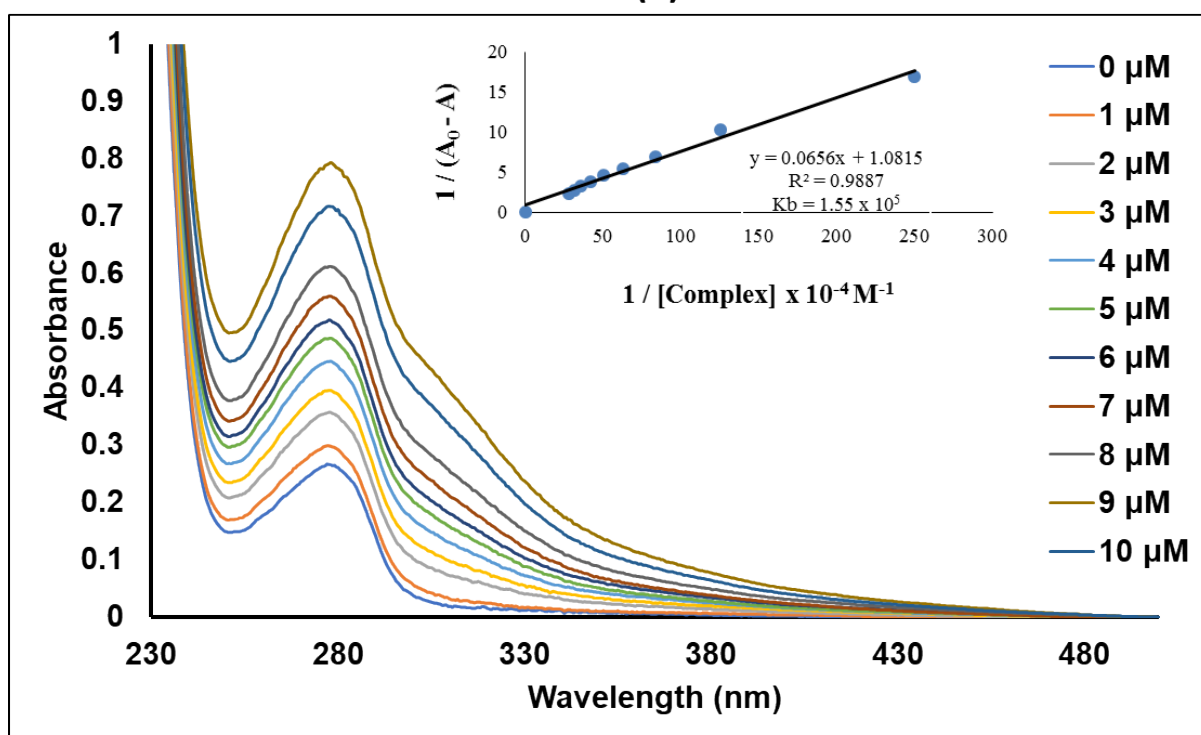

(b)

**Figure S37:** (a) Absorption spectra of **3b** in the absence and presence of increasing amounts of CT-DNA and (b) absorption spectra of BSA in the absence and presence of increasing amounts of **3b**.

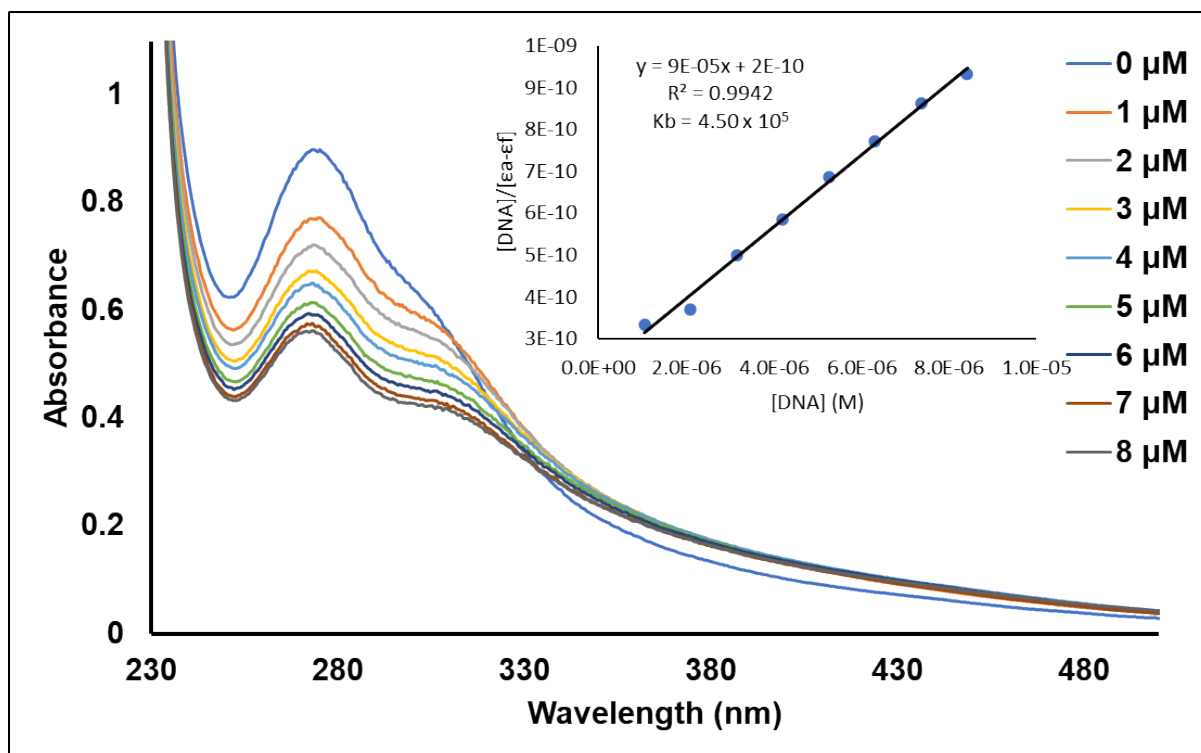

(a)

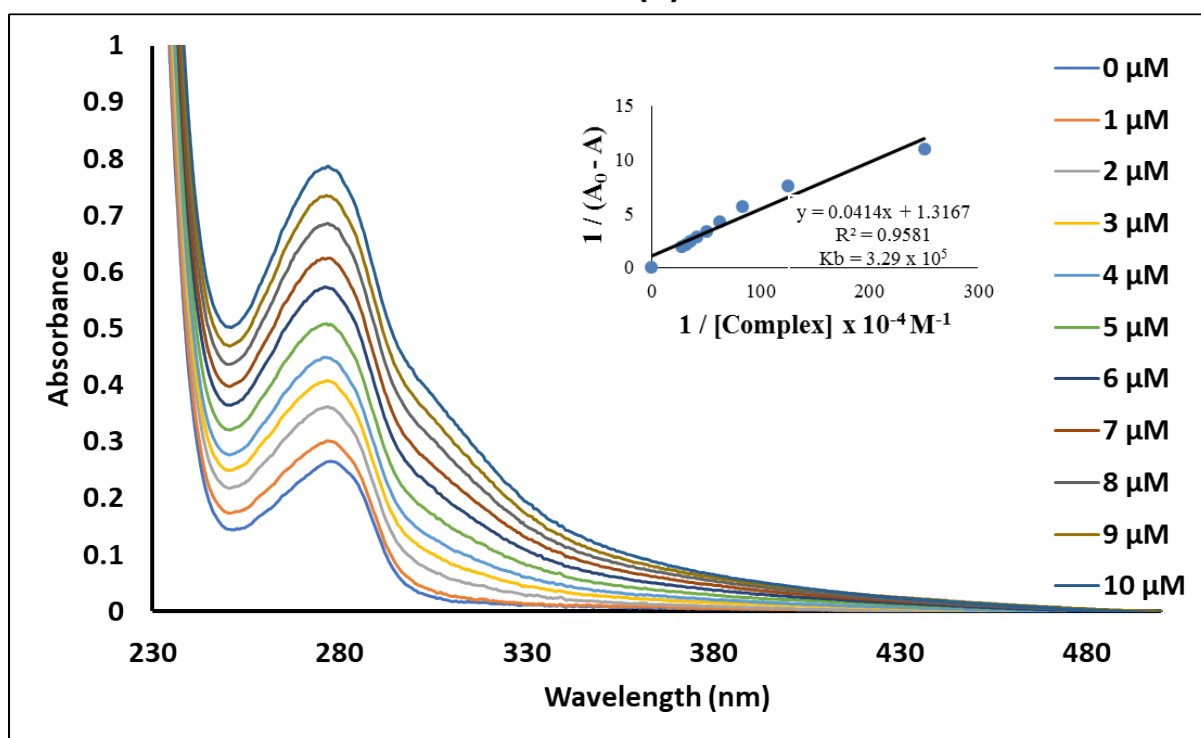

(b)

**Figure S38:** (a) Absorption spectra of **3c** in the absence and presence of increasing amounts of CT-DNA and (b) absorption spectra of BSA in the absence and presence of increasing amounts of **3c**.

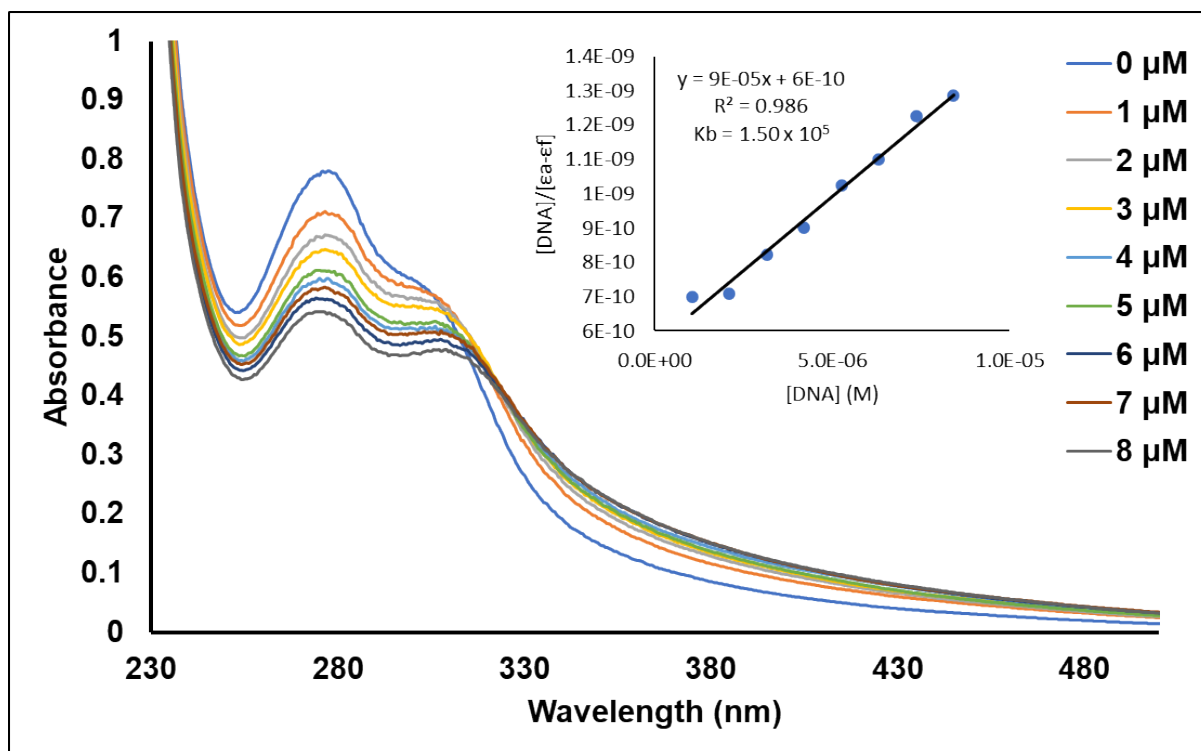

(a)

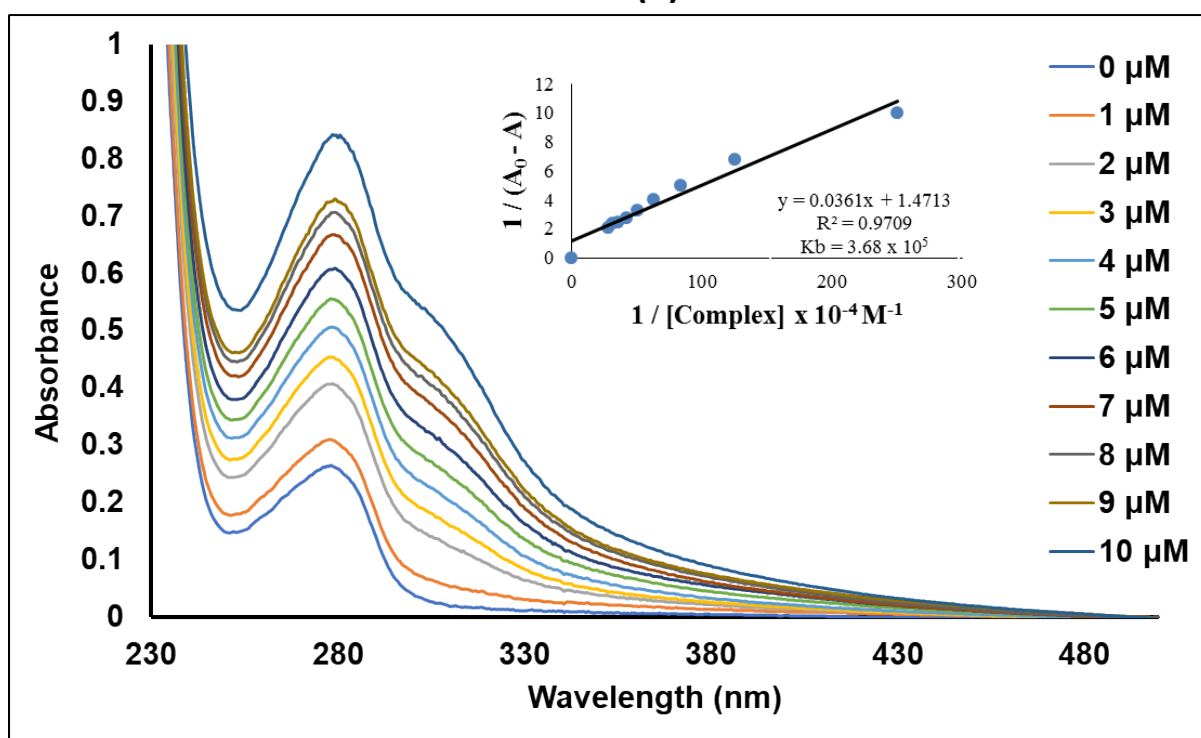

(b)

**Figure S39:** (a) Absorption spectra of **3d** in the absence and presence of increasing amounts of CT-DNA and (b) absorption spectra of BSA in the absence and presence of increasing amounts of **3d**.



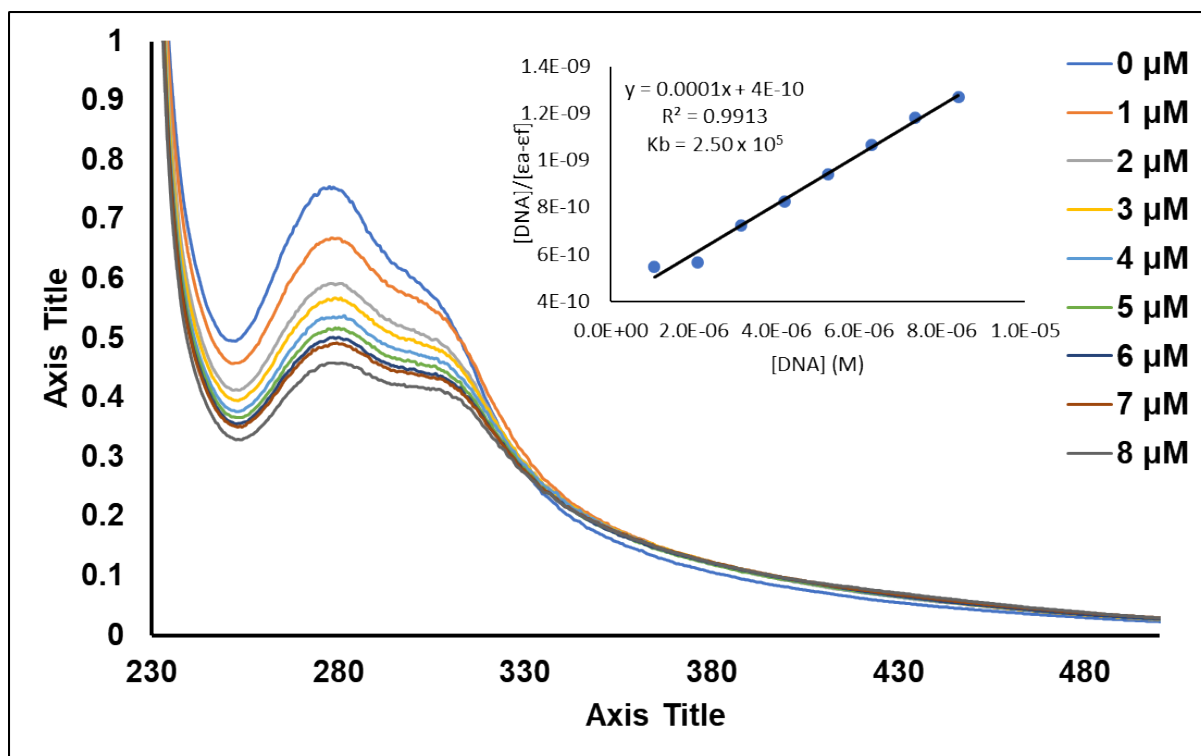

(a)

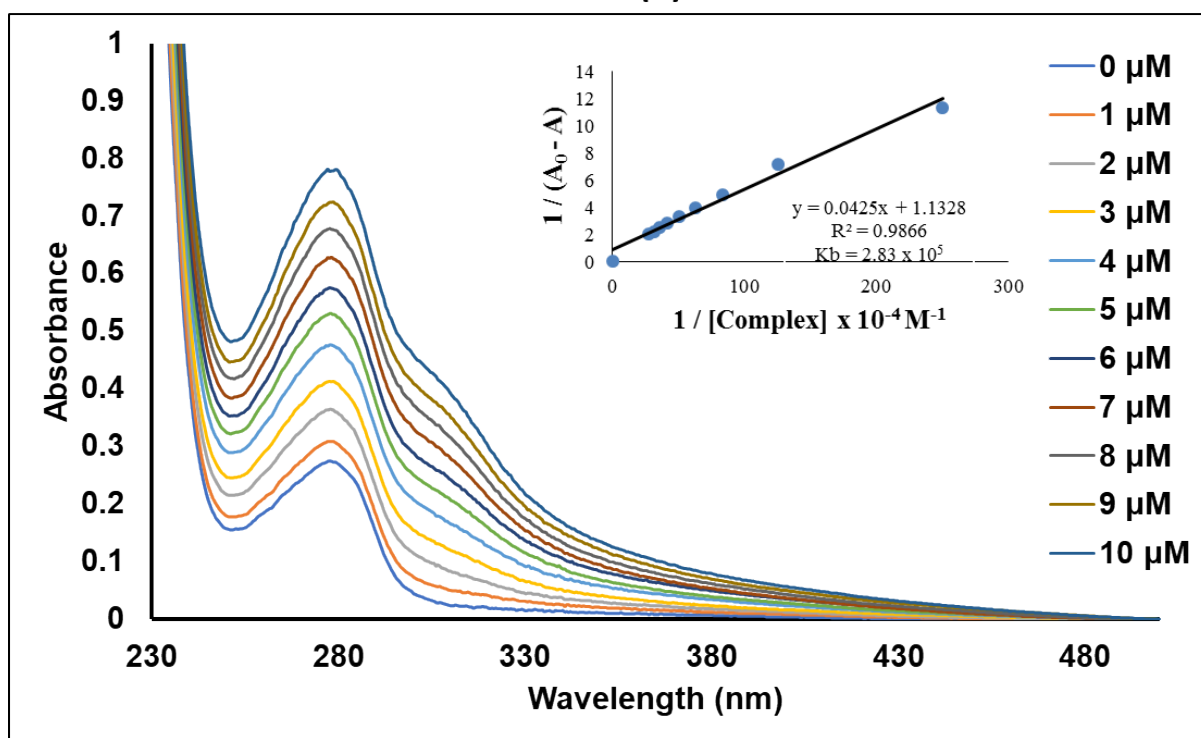

(b)

**Figure S40:** (a) Absorption spectra of **3e** in the absence and presence of increasing amounts of CT-DNA and (b) absorption spectra of BSA in the absence and presence of increasing amounts of **3e**.

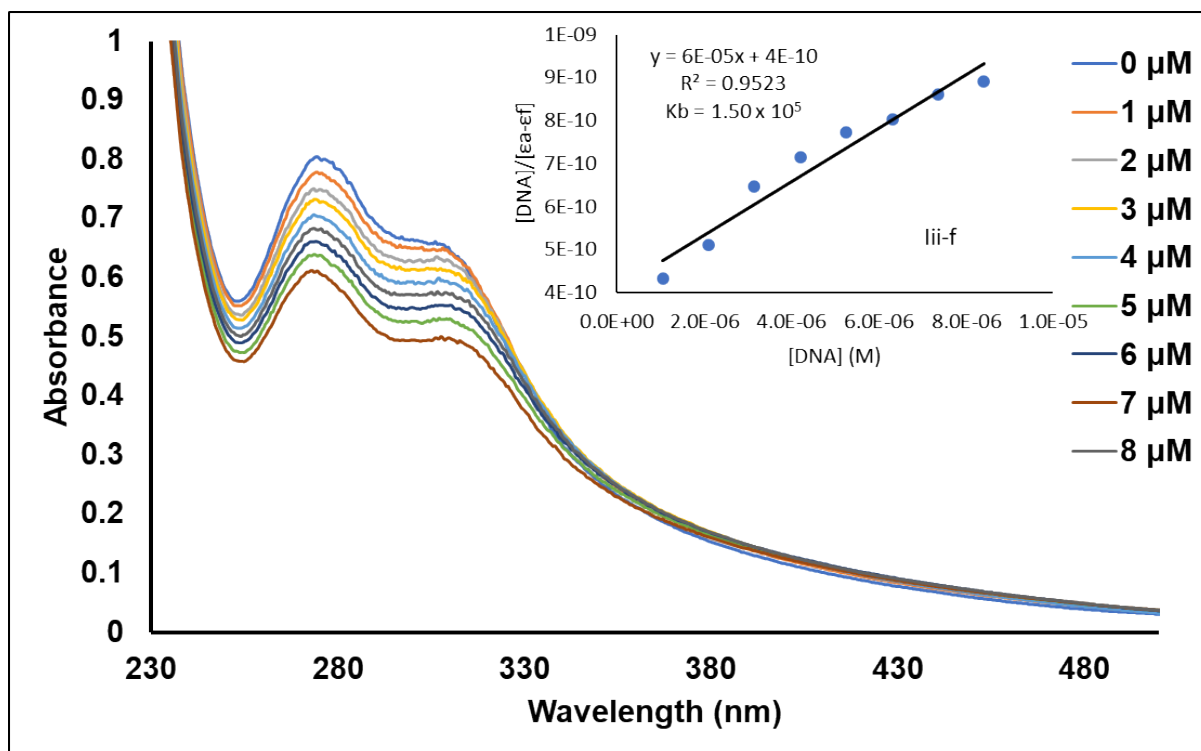

(a)

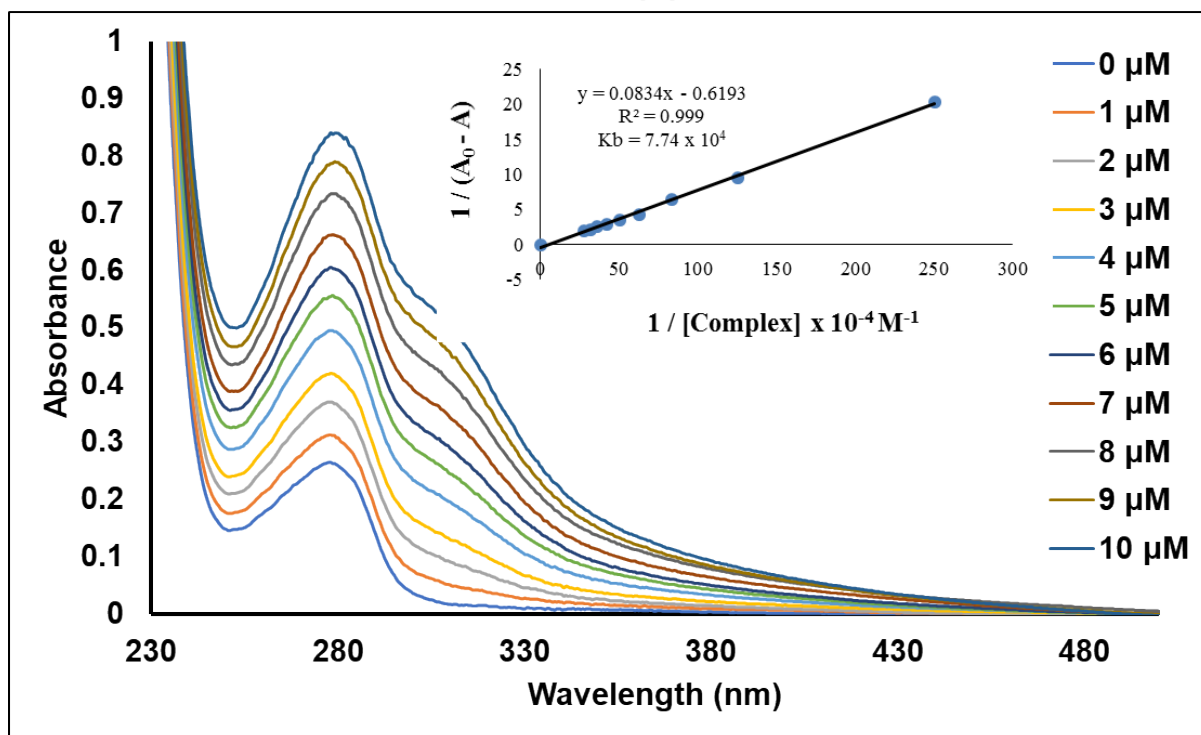

(b)

**Figure S41:** (a) Absorption spectra of **3f** in the absence and presence of increasing amounts of CT-DNA and (b) absorption spectra of BSA in the absence and presence of increasing amounts of **3f**.

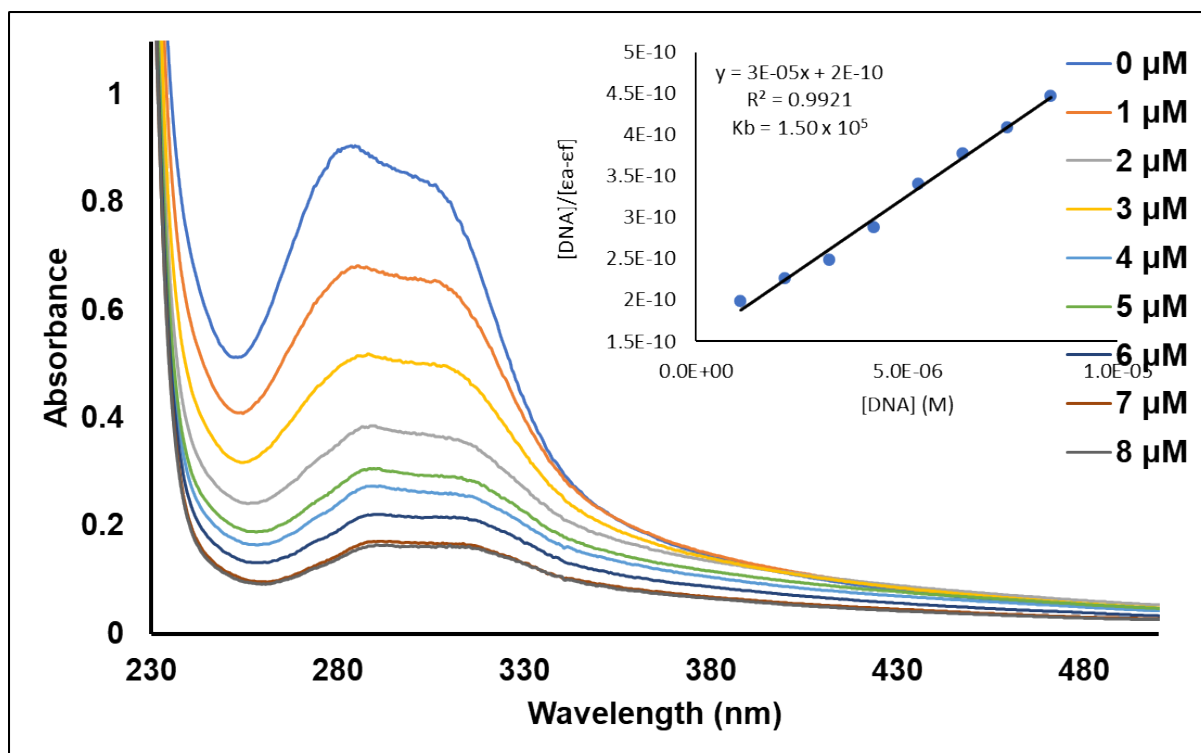

(a)

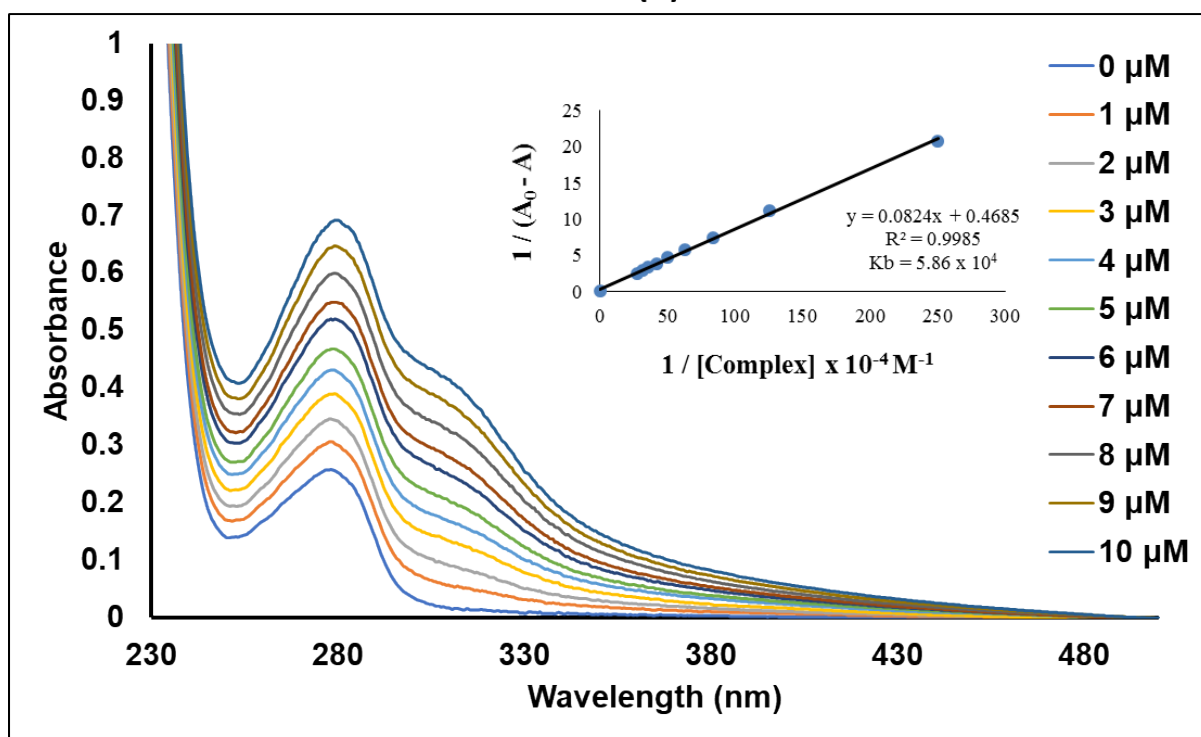

(b)

**Figure S42:** (a) Absorption spectra of **3g** in the absence and presence of increasing amounts of CT-DNA and (b) absorption spectra of BSA in the absence and presence of increasing amounts of **3g**.

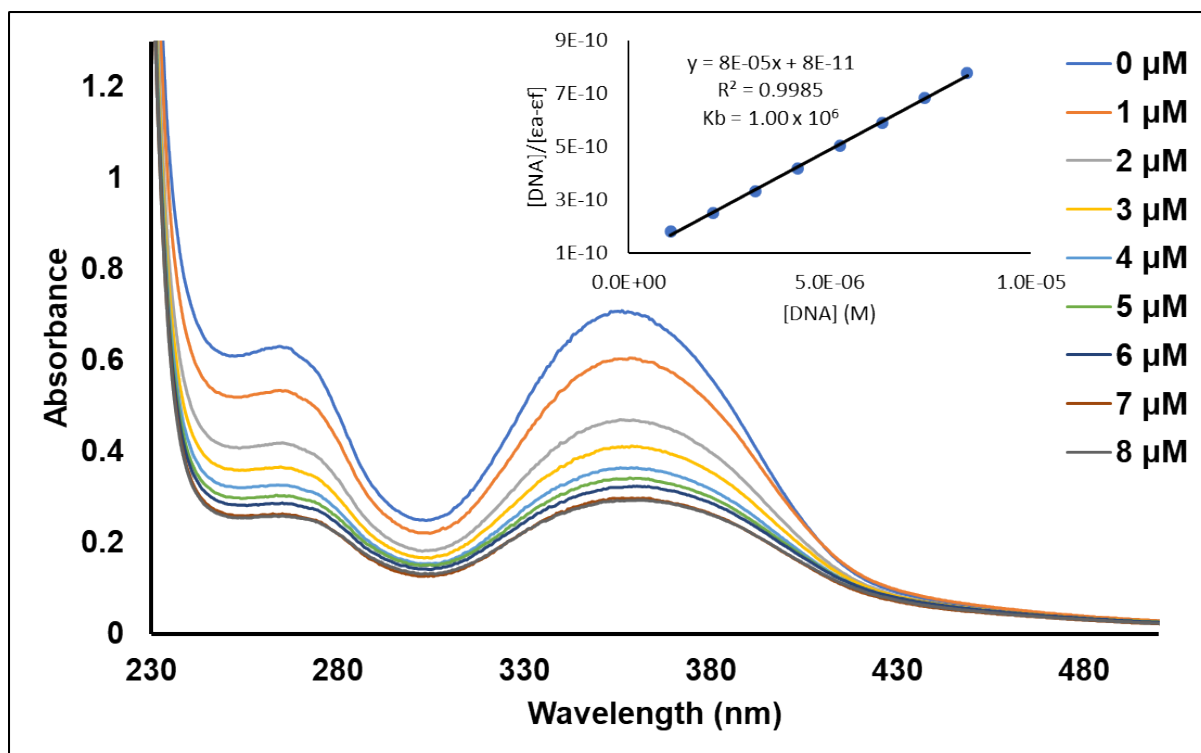

(a)

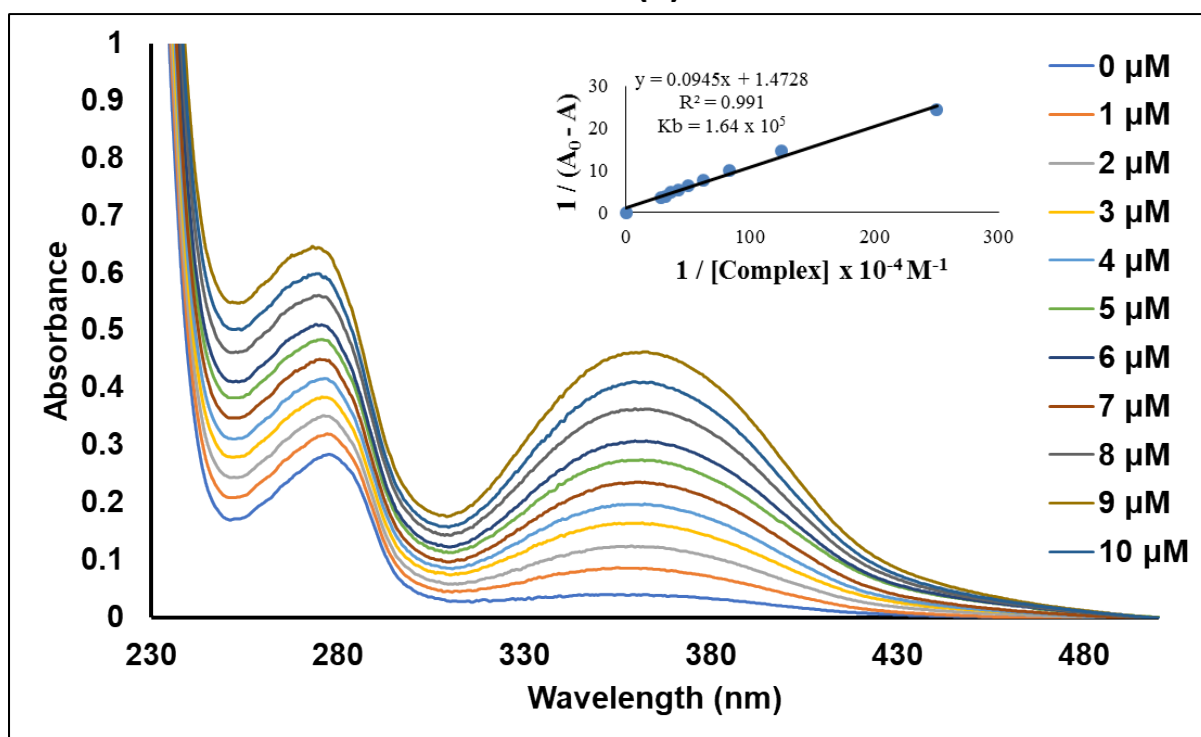

(b)

**Figure S43:** (a) Absorption spectra of **3h** in the absence and presence of increasing amounts of CT-DNA and (b) absorption spectra of BSA in the absence and presence of increasing amounts of **3h**.

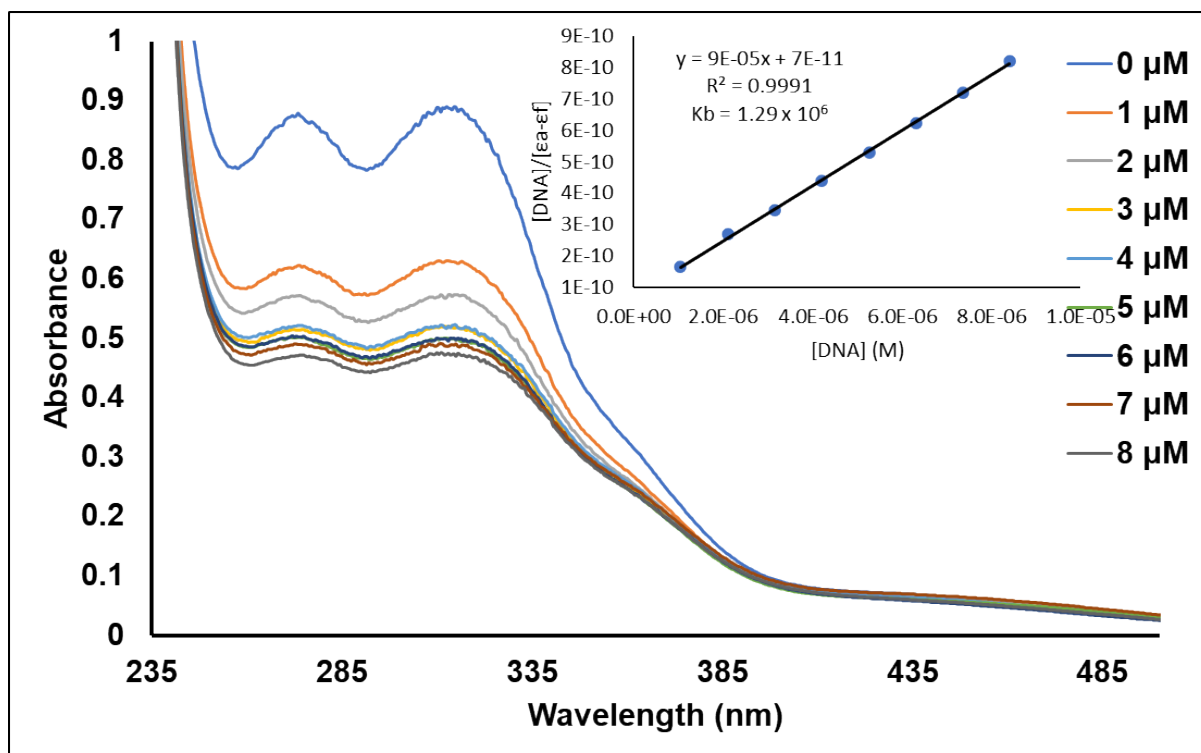

(a)

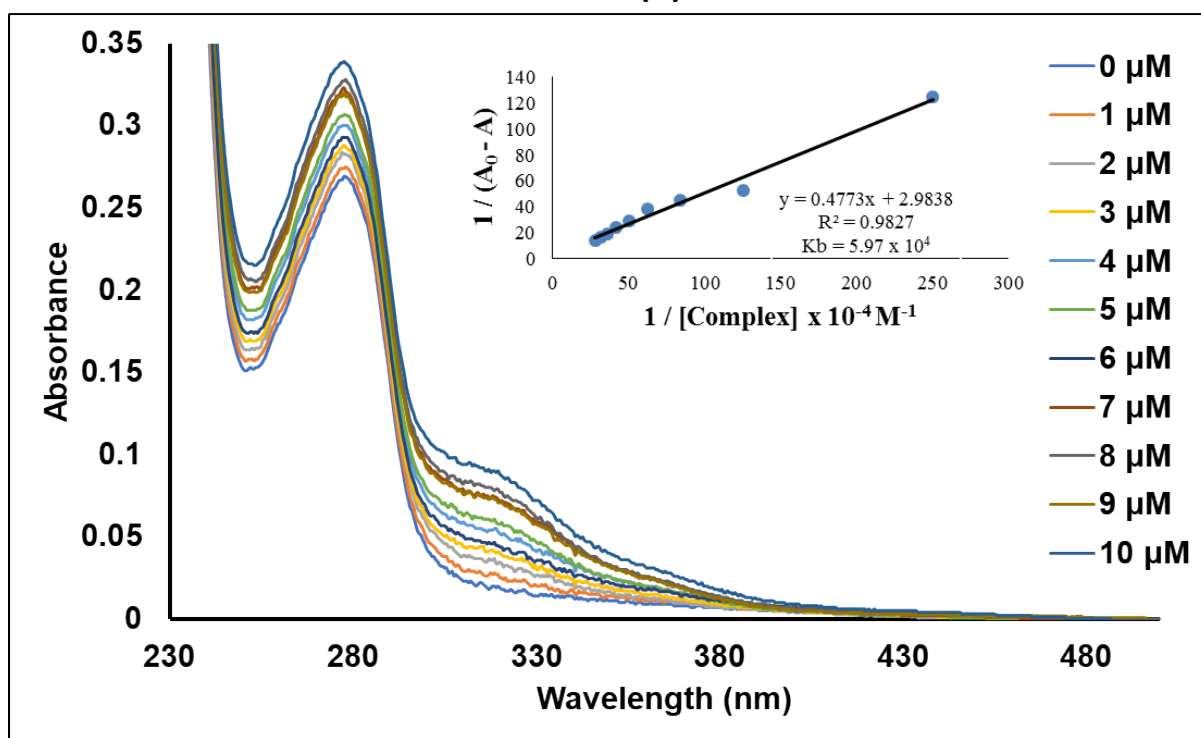

(b)

**Figure S44:** ((a) Absorption spectra of **3i** in the absence and presence of increasing amounts of CT-DNA and (b) absorption spectra of BSA in the absence and presence of increasing amounts of **3i**).

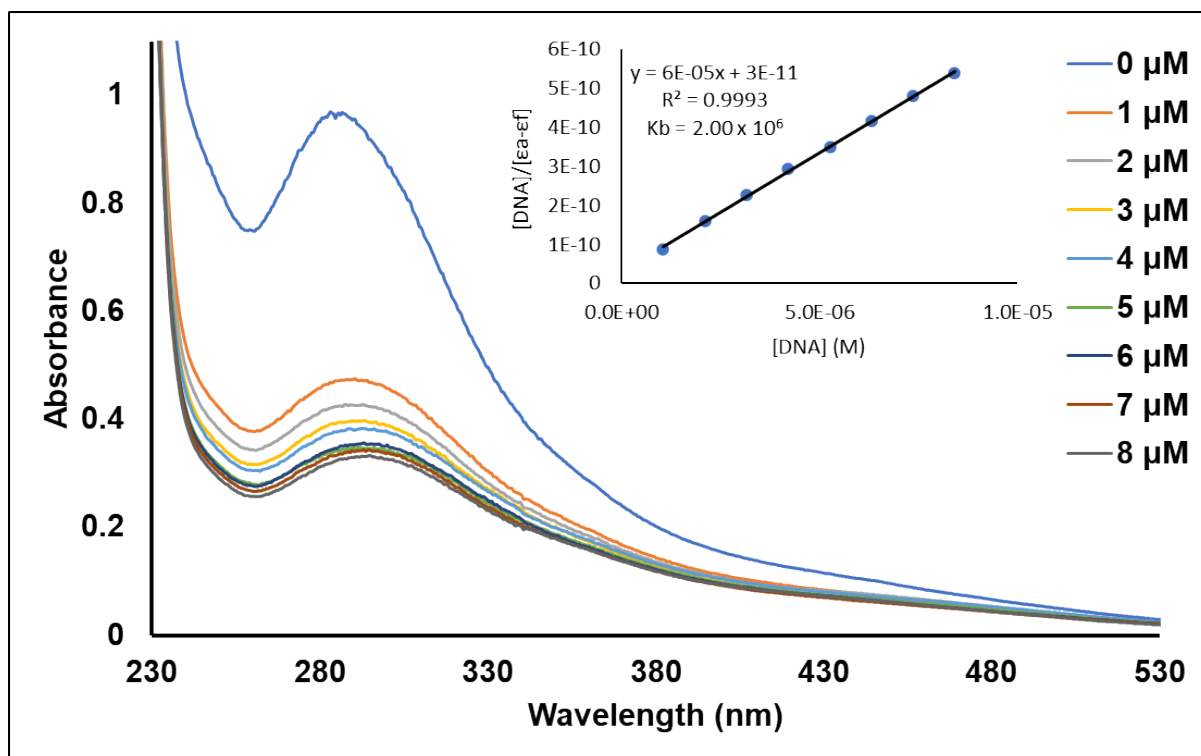

(a)

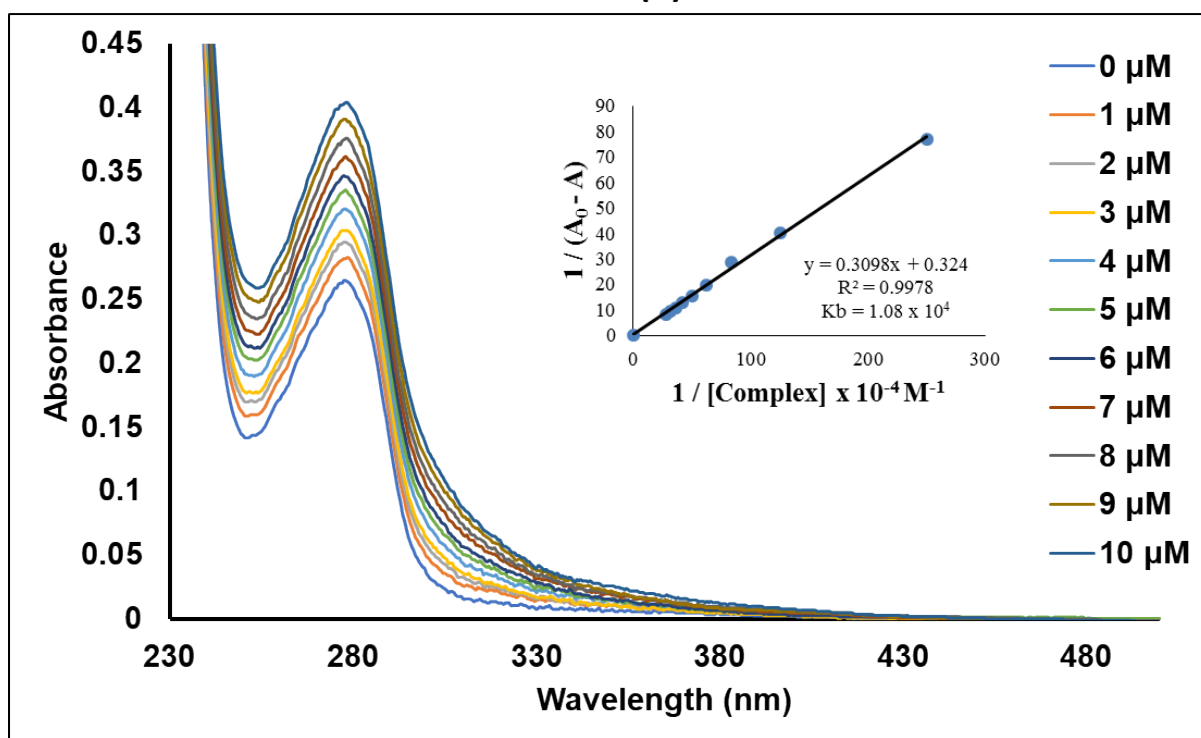

(b)

**Figure S45:** (a) Absorption spectra of **3j** in the absence and presence of increasing amounts of CT-DNA and (b) absorption spectra of BSA in the absence and presence of increasing amounts of **3j**.

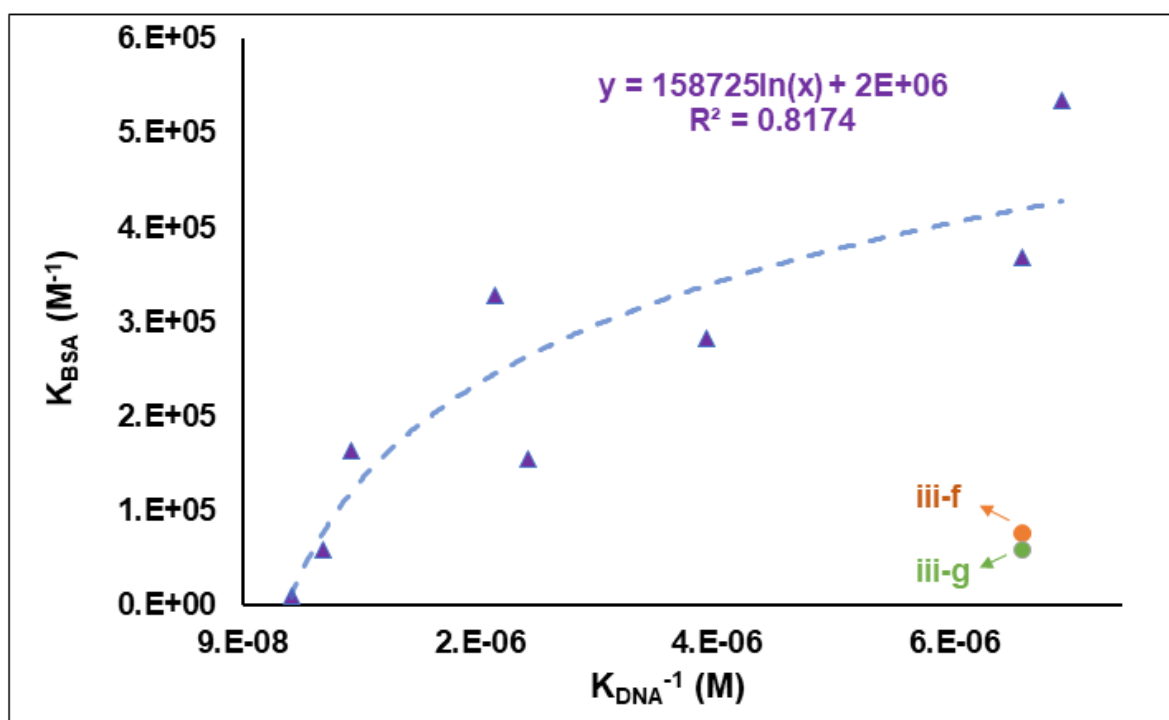

(a)

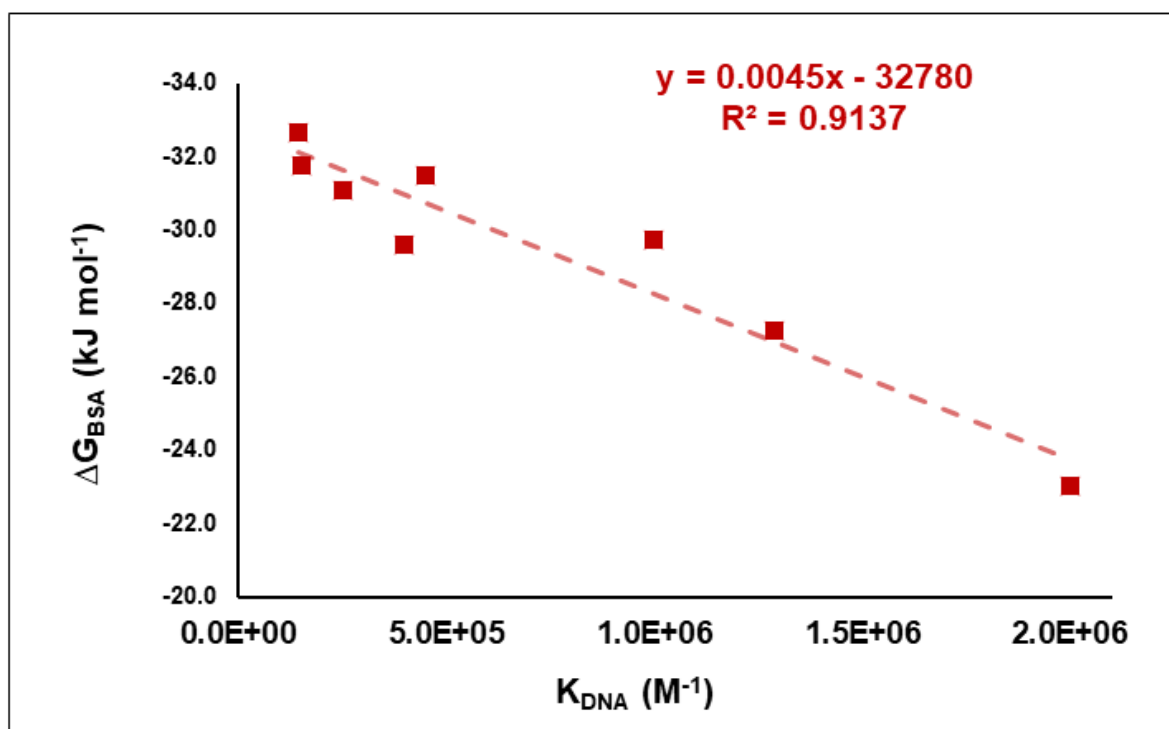

(b)

**Figure S46:** (a)  $K_{\text{DNA}}^{-1}$  versus  $K_{\text{BSA}}$  and (b)  $K_{\text{DNA}}$  versus  $\Delta G_{\text{BSA}}$ . The associated data points, trendline and equation have the same colour coding. Compounds **3f** and **3g** are outliers and were omitted when generating the trendlines in (a) and (b).
